# Supplementary material for: Evolution of Volatile Aroma Compounds and Amino Acids in Cabernet Gernischt Grape Berries (Vitis vinifera L.): Comparison of Different Training Systems for Mechanical Soil Burial
Source: MDPI journal article supplement (doi:10.3390/foods11111568), 2022-05-26
Supplement: s1 [file s1]

Supplementary Table S1 Basic physical and Chemical Properties of Aeolian soil

| Soil type    | Organic matter content/<br>(g·kg <sup>-1</sup> ) | Alkaline nitrogen content/<br>(g·kg <sup>-1</sup> ) | Alkaline phosphorus content/<br>(g·kg <sup>-1</sup> ) | Alkaline potassium content/<br>(g·kg <sup>-1</sup> ) | pH  | Percentage of each grain size/% |                   |                    |
|--------------|--------------------------------------------------|-----------------------------------------------------|-------------------------------------------------------|------------------------------------------------------|-----|---------------------------------|-------------------|--------------------|
|              |                                                  |                                                     |                                                       |                                                      |     | Clay                            | Silt              | Sand               |
|              |                                                  |                                                     |                                                       |                                                      |     | < 0.002<br>mm                   | 0.002-0.020<br>mm | 0.020-<br>2.000 mm |
| Aeolian soil | 2.74                                             | 22.35                                               | 18.64                                                 | 68.44                                                | 8.2 | 3.45                            | 6.11              | 90.44              |

Supplementary Table S2 Technological details of four training system

|                                             | Planting Distance(row×line) | Cluster per Vine | Cluster Weight(g) | Bunch (per cluster) | Yield(t/ha) | Pruning Weight (Kg) |
|---------------------------------------------|-----------------------------|------------------|-------------------|---------------------|-------------|---------------------|
| Ningxia traditional vertical trunk          | 3m×1m                       | 30±2             | 109.82±4.77       | 4                   | 8.3         | 2.11±0.13           |
| Gobelet                                     | 3m×1m                       | 25±1             | 124.71±6.29       | 4                   | 7.4         | 1.92±0.11           |
| Single Guyot                                | 3m×1m                       | 23±1             | 130.29±5.67       | 4                   | 7.1         | 1.87±0.14           |
| Slant Trunk with Vertical Shoot Positioning | 3m×1m                       | 24±1             | 133.57±9.52       | 4                   | 7.3         | 1.54±0.15           |

Supplementary Table S3 Primer sequences of real-time fluorescence quantitative PCR

| Gene           |         | Sequence of primer/5'→3'  | Accession number |
|----------------|---------|---------------------------|------------------|
| <i>Vv-Ecar</i> | Forward | CGCCACAAAGTACTCTTCAAATC   | JF808010         |
|                | Reverse | AATAATGCCTGGCCTCTAGC      |                  |
| <i>VvCCD1</i>  | Forward | GCTGGAGAAGCTGATAGTGAAG    | NM_001280915.1   |
|                | Reverse | TGGAGAGGCTGTGAAGAATCGTGC  |                  |
| <i>Vvter</i>   | Forward | AGACTTCGCACACAGACATC      | XM_002269696.1   |
|                | Reverse | CTTGCCATTGAGGTGAAACATGCCT |                  |
| <i>VvLis</i>   | Forward | CTGTCACTTCCTCTTGTCTTCTC   | AM428580.2       |
|                | Reverse | TTACACGCAACCACAACAAGCAGC  |                  |
| <i>VvActin</i> | Forward | TCCTTGCCTTGCGTCATCTAT     | EC969944         |
|                | Reverse | CACCAATCACTCTCCTGCTACAA   |                  |

|                      | 50            |               |               |               | 65            |               |                |               | 70            |               |                |               | 90             |                |                |                | 120            |                |                |                |
|----------------------|---------------|---------------|---------------|---------------|---------------|---------------|----------------|---------------|---------------|---------------|----------------|---------------|----------------|----------------|----------------|----------------|----------------|----------------|----------------|----------------|
|                      | CK            | T1            | T2            | T3            | CK            | T1            | T2             | T3            | CK            | T1            | T2             | T3            | CK             | T1             | T2             | T3             | CK             | T1             | T2             | T3             |
| Hundred-grain weight | 67.71 ± 1.85a | 68.63 ± 1.68a | 58.71 ± 3.01b | 68.97 ± 3.17a | 89.51 ± 6.06a | 75.87 ± 2.98b | 64.89 ± 3.01c  | 76.69 ± 2.05b | 92.47 ± 3.52b | 90.72 ± 6.03b | 107.27 ± 3.62a | 91.45 ± 4.65b | 146.45 ± 3.48a | 109.94 ± 2.58c | 132.74 ± 4.28b | 137.27 ± 1.59b | 144.43 ± 4.28a | 124.22 ± 4.23c | 132.44 ± 2.68b | 123.94 ± 2.85c |
| Total soluble solids | 4.61 ± 0.38b  | 4.54 ± 0.32b  | 4.72 ± 0.24ab | 5.22 ± 0.3a   | 11.85 ± 1.02b | 14.38 ± 1.2a  | 12.64 ± 0.97ab | 11.55 ± 0.36b | 14.91 ± 0.93a | 14.83 ± 1.01a | 13.06 ± 0.9b   | 15.59 ± 0.32a | 16.88 ± 0.99b  | 16.96 ± 1.17b  | 17.4 ± 0.56b   | 19.41 ± 0.92a  | 21.46 ± 1.15b  | 21.59 ± 0.91b  | 22.92 ± 0.96ab | 24.79 ± 1a     |
| Titratable acids     | 18.47 ± 0.49c | 28.34 ± 1.18a | 24.22 ± 0.92b | 25.09 ± 0.98b | 14.07 ± 1.18c | 16.17 ± 0.99b | 19.19 ± 1a     | 19.47 ± 0.89a | 8.61 ± 1.15b  | 13.7 ± 1.25a  | 11.68 ± 1.38a  | 12.03 ± 0.78a | 5.7 ± 0.96a    | 6.54 ± 0.67a   | 6.88 ± 0.67a   | 7.22 ± 0.75a   | 5.9 ± 0.65a    | 6.5 ± 0.5a     | 5.57 ± 0.49ab  | 4.76 ± 0.48b   |
| Total phenolics      | 8.65 ± 0.63b  | 9.69 ± 0.49a  | 10.34 ± 0.51a | 10.57 ± 0.41a | 5.09 ± 0.69c  | 5.19 ± 0.3c   | 8.89 ± 0.21b   | 9.79 ± 0.45a  | 4.09 ± 0.84c  | 3.66 ± 0.47c  | 6.18 ± 0.66b   | 8.69 ± 0.27a  | 3.96 ± 0.77b   | 3.07 ± 0.62b   | 6.45 ± 0.4a    | 6.69 ± 0.29a   | 2.37 ± 0.54c   | 2.44 ± 0.48c   | 4.14 ± 0.38b   | 5.51 ± 0.34a   |

| Table 1. The effect of the concentration of the organic acids on the growth of the strains of <i>S. aureus</i> and <i>E. coli</i> in the presence of the organic acids |               |         |             |             |             |            |           |         |       |        |        |       |        |        |       |        |       |        |       |        |        |       |  |  |  |     |  |  |  |  |  |
|------------------------------------------------------------------------------------------------------------------------------------------------------------------------|---------------|---------|-------------|-------------|-------------|------------|-----------|---------|-------|--------|--------|-------|--------|--------|-------|--------|-------|--------|-------|--------|--------|-------|--|--|--|-----|--|--|--|--|--|
|                                                                                                                                                                        |               | 50      |             |             |             |            |           | 65      |       |        |        |       |        | 70     |       |        |       |        |       | 90     |        |       |  |  |  | 120 |  |  |  |  |  |
| NO                                                                                                                                                                     | Compounds     | Formula | CK          | T1          | T2          | T3         | CK        | T1      | T2    | T3     | CK     | T1    | T2     | T3     | CK    | T1     | T2    | T3     | CK    | T1     | T2     | T3    |  |  |  |     |  |  |  |  |  |
| Total acids                                                                                                                                                            |               |         |             |             |             |            |           |         |       |        |        |       |        |        |       |        |       |        |       |        |        |       |  |  |  |     |  |  |  |  |  |
| 1                                                                                                                                                                      | Acetic acid   | C2H4O2  | 0.11±0.9c   | ND          | 0.51±0.28a  | 0.17±0.09b | 0.11±0.05 | 0.13 ±  | ND    | 0.11 ± | 0.05 ± | ND    | 0.19 ± | ND     | ND    | 0.23 ± | ND    | 0.59 ± | ND    | 0.15 ± | 0.1 ±  | ND    |  |  |  |     |  |  |  |  |  |
|                                                                                                                                                                        |               |         |             |             |             |            | a         | 0.03a   |       | 0.06a  | 0.04b  |       | 0.11a  |        |       | 0.12a  |       | 0.07b  |       | 0.02a  | 0.06b  |       |  |  |  |     |  |  |  |  |  |
| 2                                                                                                                                                                      | Nonanoic acid | C9H18O2 | 37.46±5.47a | 30.01±3.73c | 26.08±2.83d | 30.49 ±    | 42.21 ±   | 57.14 ± | 39.19 | 42.68  | 11.86  | 12.33 | 7.72 ± | 7.19 ± | 6.45  | 5.36 ± | 5.1 ± | 4.54 ± | 4.45  | 4.35 ± | 4.36 ± | 4.38  |  |  |  |     |  |  |  |  |  |
|                                                                                                                                                                        |               |         |             |             |             | 3.77b      | 3.27c     | 8.19a   | ±     | ±      | ±      | ±     | 3.89c  | 2.81d  | ±     | 0.79b  | 0.58c | 0.19d  | ±     | 0.69c  | 1.78c  | ±     |  |  |  |     |  |  |  |  |  |
|                                                                                                                                                                        |               |         |             |             |             |            |           |         | 5.28d | 6.29b  | 1.73b  | 3.29a |        |        | 1.98a |        |       |        | 1.89a |        |        | 0.48b |  |  |  |     |  |  |  |  |  |
| Total alcohols                                                                                                                                                         |               |         |             |             |             |            |           |         |       |        |        |       |        |        |       |        |       |        |       |        |        |       |  |  |  |     |  |  |  |  |  |

[illegible]

|    |                              |         |               |               |               |               |              |                |              |               |               |               |              |               |              |               |              |               |              |               |              |               |              |               |             |               |              |               |    |               |              |                |    |                |              |               |    |                |              |    |              |
|----|------------------------------|---------|---------------|---------------|---------------|---------------|--------------|----------------|--------------|---------------|---------------|---------------|--------------|---------------|--------------|---------------|--------------|---------------|--------------|---------------|--------------|---------------|--------------|---------------|-------------|---------------|--------------|---------------|----|---------------|--------------|----------------|----|----------------|--------------|---------------|----|----------------|--------------|----|--------------|
| 11 | 1-Heptanol                   | C7H16O  | 1.01 ± 0.54a  | 1.15 ± 0.39ab | ND            | ND            | ND           | ND             | 2.32 ± 0.89a | ND            | ND            | ND            | ND           | ND            | ND           | ND            | ND           | ND            | 2.99 ± 1.34a | ND            | 3.1 ± 2.02a  | ND            |              |               |             |               |              |               |    |               |              |                |    |                |              |               |    |                |              |    |              |
| 12 | Phenylethyl Alcohol          | C8H10O  | 15.06 ± 2.88a | 17.08 ± 3.39c | 18.12 ± 6.48b | 24.43 ± 5.34a | ±            | 43.85 ± 10.09b | ±            | 89.92 ± 9.98a | ±             | 39.02 ± 7.01c | ±            | 32.68 ± 6.99d | ±            | 14.4 ± 3.77c  | ±            | 16.36 ± 7.29b | ±            | 11.95 ± 8.39d | ±            | 37.83 ± 7.06a | ±            | 29.78 ± 7.56b | ±           | 21.82 ± 4.28d | ±            | 28.82 ± 5.66c | ±  | 47.81 ± 7.35a | ±            | 79.81 ± 10.92a | ±  | 63.18 ± 28.78d | ±            | 67.2 ± 29.47c | ±  | 69.87 ± 11.73b |              |    |              |
| 13 | 2-Ethyl-1-hexanol            | C8H18O  | 11.87 ± 3.76c | 12.62 ± 4.78b | 5.56 ± 5.77d  | 14.16 ± 4.16a | ±            | 1.89 ± 0.77a   | ±            | 9.32 ± 4.36b  | ±             | 5.43 ± 2.18c  | ±            | 11.72 ± 4.88a | ±            | 9.89 ± 2.1b   | ±            | 12.11 ± 3.03a | ±            | 12.48 ± 0.93b | ±            | 4.36 ± 4.39a  | ±            | 6.55 ± 0.93b  | ±           | 18.41 ± 4.39a | ±            | 5.81 ± 1.7c   | ±  | 4.49 ± 1.88d  | ±            | ND             | ±  | ND             | ±            | ND            | ±  | ND             | ±            | ND |              |
| 14 | (S)-3-Ethyl-4-methylpentanol | C8H18O  | 3.22 ± 1.36a  | ND            | 2.17 ± 1.18b  | ND            | ND           | ND             | ND           | 1.94 ± 0.54a  | ND            | ND            | ND           | ND            | ND           | ND            | ND           | ND            | ND           | ND            | ND           | ND            | ND           | ND            | ND          | ND            | ND           | ND            | ND | ND            | ND           | ND             | ND | ND             | ND           | ND            | ND | ND             | ND           | ND | ND           |
| 15 | 1,2-Dihydrolinalool          | C10H20O | ND            | 2.57 ± 0.89a  | ND            | ND            | ND           | ND             | ND           | ND            | ND            | ND            | ND           | ND            | ND           | ND            | ND           | ND            | ND           | ND            | ND           | ND            | ND           | ND            | ND          | ND            | ND           | ND            | ND | ND            | ND           | ND             | ND | ND             | ND           | ND            | ND | ND             | ND           | ND | ND           |
| 16 | 2-Ethoxy-ethanol             | C4H10O2 | ND            | ND            | ND            | ND            | ND           | ND             | 2.56 ± 0.49a | ±             | 3.91 ± 1.32b  | ±             | 2.56 ± 0.8a  | ND            | ND           | 2.94 ± 1.02ab | ±            | 3.26 ± 0.42a  | ND           | ND            | 3.51 ± 1.18a | ND            | ND           | ND            | ND          | ND            | ND           | ND            | ND | ND            | ND           | ND             | ND | ND             | ND           | ND            | ND | ND             | ND           | ND | ND           |
| 17 | 4-Methyl-1-hexanol           | C7H16O  | ND            | ND            | ND            | ND            | 2.78 ± 0.62a | ±              | ND           | ND            | 2.42 ± 1.51ab | ±             | 2.17 ± 1.27d | ±             | 2.4 ± 0.83a  | ±             | 2.27 ± 1.38b | ±             | 2.21 ± 0.79c | ND            | 2.84 ± 2.21a | ±             | 2.61 ± 1.78a | ±             | ND          | ±             | 2.57 ± 0.64a | ±             | ND | ±             | 2.57 ± 0.64a | ±              | ND | ±              | 2.57 ± 0.64a | ±             | ND | ±              | 2.57 ± 0.64a | ±  | 2.45 ± 0.72a |
| 18 | α-Methyl-benzenemethanol     | C8H10O  | ND            | ND            | ND            | ND            | ND           | ND             | ND           | ND            | ND            | ND            | ND           | ND            | ND           | ND            | ND           | ND            | ND           | ND            | 8.56 ± 3.28a | ±             | ND           | ±             | 6.3 ± 1.81b | ±             | 5.93 ± 2.84c |               |    |               |              |                |    |                |              |               |    |                |              |    |              |
| 19 | 1-Phenyl-1-decanol           | C16H26O | ND            | ND            | ND            | ND            | ND           | ND             | ND           | ND            | ND            | ND            | ND           | ND            | 4.07 ± 3.22a | ±             | ND           | ND            | ND           | ND            | ND           | 3.86 ± 1.47a  | ±            | ND            | ±           | 4.34 ± 1.38b  |              |               |    |               |              |                |    |                |              |               |    |                |              |    |              |

|    | Total               | carbonyl compounds |            |             |            |             |       |   |          |       |        |       |       |       |        |       |       |       |       |       |        |       |       |       |       |       |
|----|---------------------|--------------------|------------|-------------|------------|-------------|-------|---|----------|-------|--------|-------|-------|-------|--------|-------|-------|-------|-------|-------|--------|-------|-------|-------|-------|-------|
| 21 | Octanal             | C8H16O             | 0.01±0.01a | ND          | ND         | 0.05±0.02b  | 0.94  | ± | 1.46     | ±     | ND     | ND    | 0.21± | 0.27  | ND     | ND    | 0.27  | ND    | ND    | 0.22± | ND     | 0.87± | 0.49± | 0.88  |       |       |
|    |                     |                    |            |             |            |             | 0.28a |   | 0.32b    |       |        |       | 0.12a | ±     |        |       | ±     |       |       | 0.11a |        | 0.23a | 0.18b | ±     |       |       |
|    |                     |                    |            |             |            |             |       |   |          |       |        |       | 0.07a |       |        |       | 0.08a |       |       |       |        |       |       | 0.43a |       |       |
| 22 | Acrolein            | C3H4O              | 0.12±0.03a | ND          | ND         | ND          | ND    |   | 0.1±0.1a | ND    | ND     | 0.04± | 0.04  | ND    | ND     | 0.04  | ND    | ND    | ND    | ND    | ND     | ND    | 0.15± | ND    |       |       |
|    |                     |                    |            |             |            |             |       |   |          |       |        | 0.02a | ±     |       |        | ±     |       |       |       |       |        | 0.07a |       |       |       |       |
|    |                     |                    |            |             |            |             |       |   |          |       |        | 0.02a |       |       |        | 0.03a |       |       |       |       |        |       |       |       |       |       |
| 23 | Trans-2-pentenal    | C8H14O             | ND         | 20.15±3.83a | ND         | ND          | 27.5  | ± | 46.82    | ±     | 35.33  | 41.4± | 33.5± | 45.11 | 36.33  | 40.35 | 34.74 | 31.29 | 27.68 | 32.15 | 19.95  | 57.11 | 28.69 | 39.07 |       |       |
|    |                     |                    |            |             |            |             | 5.33d |   | 7.48a    |       | ±      | 9.02b | 6.3c  | ±     | ±      | ±     | ±     | ±     | ±     | ±     | ±      | ±     | ±     | ±     |       |       |
|    |                     |                    |            |             |            |             |       |   |          | 4.29c |        |       | 4.39a | 9.25b | 10.21a | 5.22a | 4.32c |       | 8.33b | 7.29d | 22.19a | 9.32c | 10.06 |       |       |       |
|    |                     |                    |            |             |            |             |       |   |          |       |        |       |       |       |        |       |       |       |       |       |        |       | b     |       |       |       |
| 24 | 4-Cis-decenal       | C10H18O            | ND         | ND          | ND         | ND          | ND    |   | ND       | ND    | ND     | ND    | ND    | ND    | ND     | 0.91  | ND    | ND    | ND    | ND    | ND     | ND    | ND    | ND    |       |       |
|    |                     |                    |            |             |            |             |       |   |          |       |        |       |       |       |        | ±     |       |       |       |       |        |       |       |       |       |       |
|    |                     |                    |            |             |            |             |       |   |          |       |        |       |       |       |        | 0.65a |       |       |       |       |        |       |       |       |       |       |
| 25 | 1,3-Cyclopentadione | C5H6O2             | 0.16±0.06b | 0.21±0.11a  | 0.17±0.03b | 0.11±0.02c  | ND    |   | ND       | 0.07± | 0.1    | ±     | 1.14± | ND    | 0.3    | ±     | 1.83± | 1.03  | 0.87± | ND    | 2.12±  | ND    | 0.14± | 0.13± | 0.25  |       |
|    |                     |                    |            |             |            |             |       |   |          | 0.04a | 0.03ab | 0.45b |       | 0.1c  | 0.56a  | ±     | 0.19c |       | 1.22a |       | 0.05b  | 0.04b | ±     |       |       |       |
|    |                     |                    |            |             |            |             |       |   |          |       |        |       |       |       |        | 0.28b |       |       |       |       |        |       | 0.11a |       |       |       |
| 26 | Artemisia ketone    | C10H16O            | 0.17±0.08a | 0.38±0.13b  | 0.77±0.46c | ND          | 0.1   | ± | 0.2      | ±     | 0.13±  | 0.04± | 0.06± | 0.06  | ND     | ND    | 0.03  | 0.03± | 0.08± | ND    | 0.03   | 0.02± | 0.03± | 0.04  |       |       |
|    |                     |                    |            |             |            |             | 0.06c |   | 0.12a    |       | 0.09b  | 0.01d | 0.02a | ±     |        |       | ±     | 0.01a | 0.04b |       | ±      | 0.01a | 0.01a | ±     |       |       |
|    |                     |                    |            |             |            |             |       |   |          |       |        |       | 0.03a |       |        |       | 0.02a |       |       | 0.01a |        |       | 0.02a |       |       |       |
| 27 | Benzaldehyde        | C7H6O              | 9.06±3.43b | ND          | 5.93±2.28c | 9.84±4.29a  | 8.86  | ± | 21.56    | ±     | 16.39  | 17.51 | 13.25 | 20.36 | 17.02  | 18.72 | 20.3  | 15.56 | 15.09 | 8.36± | 15.79  | 15.23 | 9.71± | 15.01 |       |       |
|    |                     |                    |            |             |            |             | 3.98d |   | 5.3a     |       | ±      | ±     | ±     | ±     | ±      | ±     | ±     | ±     | ±     | 1.92d | ±      | ±     | 0.91d | ±     |       |       |
|    |                     |                    |            |             |            |             |       |   |          | 3.93c | 4.72b  | 4.89d | 3.19a | 5.33c | 2.81b  | 9.19a | 3.29b | 4.42c |       | 4.38a | 4.11b  |       | 3.16c |       |       |       |
| 28 | 2,6-                | C9H10O             | 20.75      | ±           | 21.76±2.1a | 20.63±3.89c | 19.39 | ± | 14.22    | ±     | ND     | 16.5± | 18.65 | 19    | ±      | ND    | 21.5± | 24.94 | 21.16 | 21.12 | 22.04  | 18.99 | 23.49 | 21.34 | 22.48 | 20.32 |

|                |                                   |         |               |               |               |              |         |         |        |        |        |         |        |        |        |        |        |         |       |        |        |       |  |   |  |  |   |  |  |   |  |       |   |  |  |
|----------------|-----------------------------------|---------|---------------|---------------|---------------|--------------|---------|---------|--------|--------|--------|---------|--------|--------|--------|--------|--------|---------|-------|--------|--------|-------|--|---|--|--|---|--|--|---|--|-------|---|--|--|
|                | Dimethylbenzaldehyde              |         | 4.18b         |               |               | 3.11d        |         |         | 5.22c  |        |        | 2.91b ± |        |        | 3.21c  |        |        | 8.29b ± |       |        | ±      |       |  | ± |  |  | ± |  |  | ± |  |       | ± |  |  |
|                |                                   |         |               |               |               |              |         |         |        |        |        |         |        |        |        |        |        |         |       |        |        |       |  |   |  |  |   |  |  |   |  |       |   |  |  |
|                |                                   |         |               |               |               |              |         |         |        |        |        |         |        |        |        |        |        |         |       |        |        |       |  |   |  |  |   |  |  |   |  |       |   |  |  |
| 29             | 2-Methyl-benzaldehyde             | C8H8O   | 84.75 ± 8.22c | 96.05 ± 3.59a | 79.05 ± 2.17d | 85.1 ± 7.48b | 96.53 ± | 70.92 ± | 117.86 | 119.97 | 106.39 | 114.06  | 111.86 | ND     | 119.59 | ND     | 115.41 | 90.06   | 121.7 | 110.42 | 121.79 | 114.4 |  |   |  |  |   |  |  |   |  |       |   |  |  |
|                |                                   |         |               |               |               |              | 3.13c   | 6.53d   | ±      | ±      | ±      | ±       | ±      |        | ±      |        | ±      | ±       | 7 ±   | ±      | ±      | ±     |  |   |  |  |   |  |  |   |  |       |   |  |  |
|                |                                   |         |               |               |               |              |         |         | 3.21b  | 8.43a  | 4.26c  | 3.11a   | 6.53b  |        | 8.74a  |        | 12.19b | 8.92c   | 14.23 | 8.79d  | 22.17a | 10.01 |  |   |  |  |   |  |  |   |  |       |   |  |  |
|                |                                   |         |               |               |               |              |         |         |        |        |        |         |        |        |        |        |        |         | b     |        |        |       |  |   |  |  |   |  |  |   |  | c     |   |  |  |
| 30             | (E,E)-2,4-Hexadienal              | C6H8O   | 17.89 ± 4.89c | 20.98 ± 3.21b | 23.13 ± 5.28a | 23.98 ±      | 18.53 ± | 23.87 ± | 25.13  | 28.24  | 18.9 ± | 28.38   | 27.29  | 42.37  | 19.59  | 37.9 ± | 30.89  | 45.89   | 37.58 | 45.65  | 33.21  | 54.2  |  |   |  |  |   |  |  |   |  |       |   |  |  |
|                |                                   |         |               |               |               | 7.31a        | 4.28a   | 12.73c  | ±      | ±      | 4.27d  | ±       | ±      | ±      | ±      | 10.24b | ±      | ±       | ±     | ±      | ±      | ±     |  |   |  |  |   |  |  |   |  |       |   |  |  |
|                |                                   |         |               |               |               |              |         |         | 3.54b  | 5.21a  |        | 3.19b   | 9.02c  | 6.48a  | 4.89a  |        | 5.18c  | 8.48a   | 6.32a | 9.49b  | 11.28c | 7.33a |  |   |  |  |   |  |  |   |  |       |   |  |  |
| 31             | (E)-2-Heptenal                    | C7H12O  | ND            | ND            | ND            | ND           | ND      | ND      | ND     | ND     | ND     | ND      | ND     | ND     | ND     | ND     | ND     | ND      | 5.91  | ND     | ND     | ND    |  |   |  |  |   |  |  |   |  |       |   |  |  |
|                |                                   |         |               |               |               |              |         |         |        |        |        |         |        |        |        |        |        |         | ±     |        |        |       |  |   |  |  |   |  |  |   |  |       |   |  |  |
|                |                                   |         |               |               |               |              |         |         |        |        |        |         |        |        |        |        |        |         | 1.07a |        |        |       |  |   |  |  |   |  |  |   |  |       |   |  |  |
| 32             | Acetone                           | C3H6O   | ND            | 2.32 ± 0.72a  | 3.11 ± 1.21b  | ND           | 3.01 ±  | 2.61 ±  | 2.91 ± | 2.81 ± | 2.86 ± | ND      | 2.67 ± | 2.3 ±  | 2.42   | 2.52 ± | 2.59 ± | 2.42 ±  | 1.78  | 2.41 ± | 2.65 ± | 2.82  |  |   |  |  |   |  |  |   |  |       |   |  |  |
|                |                                   |         |               |               |               |              | 2.81a   | 1.23d   | 0.75b  | 1.18c  | 0.83a  |         | 1.24b  | 0.92c  | ±      | 1.12b  | 0.89a  | 0.42c   | ±     | 0.28c  | 1.27b  | ±     |  |   |  |  |   |  |  |   |  |       |   |  |  |
|                |                                   |         |               |               |               |              |         |         |        |        |        |         |        |        |        | 1.28c  |        |         | 0.63d |        |        |       |  |   |  |  |   |  |  |   |  | 0.95a |   |  |  |
| 33             | Phenyl methyl ketone              | C8H8O   | ND            | ND            | ND            | ND           | ND      | ND      | ND     | ND     | ND     | 16.23   | ND     | ND     | ND     | 23.8 ± | ND     | ND      | ND    | 25.88  | ND     | 19.19 |  |   |  |  |   |  |  |   |  |       |   |  |  |
|                |                                   |         |               |               |               |              |         |         |        |        |        | ±       |        |        |        | 5.23a  |        |         |       | ±      |        | ±     |  |   |  |  |   |  |  |   |  |       |   |  |  |
|                |                                   |         |               |               |               |              |         |         |        |        |        | 3.82a   |        |        |        |        |        |         |       | 6.28a  |        | 3.38b |  |   |  |  |   |  |  |   |  |       |   |  |  |
| Total benzenes |                                   |         |               |               |               |              |         |         |        |        |        |         |        |        |        |        |        |         |       |        |        |       |  |   |  |  |   |  |  |   |  |       |   |  |  |
| 34             | 1,4-dimethoxy-Benzene             | C8H10O2 | ND            | 9.31 ± 2.75a  | 7.92 ± 1.92b  | 9.4 ± 3.24a  | 10.03 ± | 9.35 ±  | 12.02  | 12.59  | 11.61  | 13.97   | 12.54  | 13.31  | 14.33  | 12.49  | 12.61  | 10.77   | 13.3  | 12.03  | 14.34  | 12.77 |  |   |  |  |   |  |  |   |  |       |   |  |  |
|                |                                   |         |               |               |               |              | 4.23c   | 2.19d   | ±      | ±      | ±      | ±       | ±      | ±      | ±      | ±      | ±      | ±       | ±     | ±      | ±      | ±     |  |   |  |  |   |  |  |   |  |       |   |  |  |
|                |                                   |         |               |               |               |              |         |         | 5.33b  | 1.25a  | 1.74d  | 4.22a   | 1.91c  | 4.03b  | 3.37a  | 4.28c  | 2.91b  | 3.95d   | 4.26b | 1.78d  | 2.09a  | 3.91c |  |   |  |  |   |  |  |   |  |       |   |  |  |
| 35             | 2-Methoxy-1,3,5-trimethyl-Benzene | C10H14O | ND            | 5.8 ± 1.02a   | ND            | ND           | 5.95 ±  | 6.33 ±  | 5.99 ± | 6.61 ± | 6.73 ± | 8.13    | 7.99 ± | 8.06 ± | 8.47   | 6.13 ± | 7.77 ± | ND      | ND    | ND     | 7.8 ±  | ND    |  |   |  |  |   |  |  |   |  |       |   |  |  |
|                |                                   |         |               |               |               |              | 0.83c   | 2.71b   | 1.82c  | 4.31a  | 2.18c  | ±       | 2.16b  | 3.64a  | ±      | 2.17c  | 0.89b  |         |       |        | 3.38a  |       |  |   |  |  |   |  |  |   |  |       |   |  |  |
|                |                                   |         |               |               |               |              |         |         |        |        |        | 1.79a   |        |        |        | 3.93a  |        |         |       |        |        |       |  |   |  |  |   |  |  |   |  |       |   |  |  |

|    |                                                                |              |            |            |            |            |       |    |       |    |       |        |        |       |       |        |        |       |        |        |       |       |        |       |
|----|----------------------------------------------------------------|--------------|------------|------------|------------|------------|-------|----|-------|----|-------|--------|--------|-------|-------|--------|--------|-------|--------|--------|-------|-------|--------|-------|
| 36 | 1,3-Dimethyl benzene                                           | C8H10        | ND         | ND         | 2.46±2.21a | ND         | ND    | ND | ND    | ND | ND    | ND     | ND     | ND    | ND    | ND     | ND     | ND    | ND     | ND     | ND    | ND    | ND     |       |
| 37 | 1,2,3,4-tetrahydro-<br><br>1,1,6-trimethyl-<br><br>Naphthalene | C13H18       | ND         | ND         | ND         | ND         | ND    | ND | ND    | ND | ND    | ND     | ND     | ND    | ND    | ND     | ND     | ND    | ND     | ND     | 30.99 | 74.28 | 32.13  |       |
|    |                                                                |              |            |            |            |            |       |    |       |    |       |        |        |       |       |        |        |       |        |        | ±     | ±     | ±      |       |
|    |                                                                |              |            |            |            |            |       |    |       |    |       |        |        |       |       |        |        |       |        |        | 4.28c | 8.21a | 6.39b  |       |
|    | <b>Total</b>                                                   | <b>C6/C9</b> |            |            |            |            |       |    |       |    |       |        |        |       |       |        |        |       |        |        |       |       |        |       |
|    | <b>Compounds</b>                                               |              |            |            |            |            |       |    |       |    |       |        |        |       |       |        |        |       |        |        |       |       |        |       |
| 38 | 1-Hexanol                                                      | C6H14O       | ND         | ND         | 0.56±0.43a | 1.5±1.1b   | 1.37  | ±  | 0.59  | ±  | 0.31± | 0.47±  | 21.91  | ND    | ND    | 54.83  | 43.04  | 22.6± | 98.93  | 100.1  | 69.71 | 63.85 | 126.47 | 280.5 |
|    |                                                                |              |            |            |            |            | 0.47a |    | 0.33b |    | 0.17d | 0.23c  | ±      |       |       | ±      | ±      | 8.27d | ±      | ±      | ±     | ±     | ±      | 8 ±   |
|    |                                                                |              |            |            |            |            |       |    |       |    |       |        | 10.08a |       |       | 22.72b | 14.72c |       | 12.29b | 21.25a | 8.45c | 9.92d | 30.09b | 29.93 |
|    |                                                                |              |            |            |            |            |       |    |       |    |       |        |        |       |       |        |        |       |        |        |       |       |        | a     |
| 39 | Isohexyl alcohol                                               | C6H14O       | 0.45±0.22c | 0.24±0.17d | 1.6±0.67a  | 0.83±0.32b | 2.65  | ±  | 0.52  | ±  | ND    | 3.75±  | ND     | 1.51  | 0.73± | 3.17±  | 0.11±  | 0.36± | 1.85±  | 0.2 ±  | 1.97  | 0.89± | 1.53±  | 1.88  |
|    |                                                                |              |            |            |            |            | 0.94b |    | 0.17c |    |       | 1.21a  |        | ±     | 0.17c | 1.87a  | 0.04c  | 0.21b | 0.71a  | 0.2c   | ±     | 0.72d | 1.18c  | ±     |
|    |                                                                |              |            |            |            |            |       |    |       |    |       |        |        | 0.78b |       |        |        |       |        |        | 0.45a |       |        | 0.65b |
| 40 | 4-Hexen-1-ol                                                   | C6H12O       | ND         | ND         | 1.6±0.6a   | 9.3±4.27b  | 0.47  | ±  | 0.33  | ±  | ND    | 1.21±  | 0.21±  | 0.19  | 0.69± | ND     | 0.68   | ND    | 0.36±  | 0.98±  | ND    | 0.08± | ND     | 0.88  |
|    |                                                                |              |            |            |            |            | 0.16b |    | 0.22c |    |       | 0.48a  | 0.12b  | ±     | 0.24a |        | ±      |       | 0.16c  | 0.27a  |       | 0.03a |        | ±     |
|    |                                                                |              |            |            |            |            |       |    |       |    |       |        |        | 0.04c |       |        | 0.38b  |       |        |        |       |       |        | 0.43b |
| 41 | 2,3-Hexanediol                                                 | C6H14O2      | ND         | ND         | 0.29±0.11a | 2.94±1.13b | 0.13  | ±  | 0.29  | ±  | ND    | ND     | ND     | ND    | 0.61± | 0.69±  | ND     | 0.26± | ND     | 0.5 ±  | 6.3 ± | 6 ±   | 0.55±  | 0.44  |
|    |                                                                |              |            |            |            |            | 0.03a |    | 0.12b |    |       |        |        |       | 0.32a | 0.28ab |        | 0.09a |        | 0.27b  | 2.22a | 1.87b | 0.28c  | ±     |
|    |                                                                |              |            |            |            |            |       |    |       |    |       |        |        |       |       |        |        |       |        |        |       |       |        | 0.12c |
| 42 | Cis-3-Hexenol                                                  | C6H14O       | ND         | ND         | ND         | ND         | ND    | ND | ND    | ND | ND    | 18.46  | 22.84  | 12.07 | 11.91 | 16.15  | 28.15  | 12.99 | 10.51  | 16.46  | 78.15 | 10.37 | 14.18  |       |
|    |                                                                |              |            |            |            |            |       |    |       |    |       | ±      | ±      | ±     | ±     | ±      | ±      | ±     | ±      |        |       |       |        |       |
|    |                                                                |              |            |            |            |            |       |    |       |    |       | 4.92b  | 7.81a  | 2.02c | 3.76d | 4.02b  | 3.22a  | 3.83c | 1.98d  |        |       |       |        |       |
| 43 | Trans-2-hexenol                                                | C6H14O       | ND         | ND         | ND         | ND         | ND    | ND | ND    | ND | ND    | 31.73  | ND     | ND    | ND    | 33.18  | 45.28  | ND    | ND     | 32.38  | ND    | 41.99 | ND     |       |
|    |                                                                |              |            |            |            |            |       |    |       |    |       | ±      |        |       |       | ±      | ±      |       |        | ±      |       | ±     |        |       |
|    |                                                                |              |            |            |            |            |       |    |       |    |       | 10.03a |        |       |       | 4.82a  | 8.92b  |       |        | 10.83a |       | 2.34b |        |       |



|    |                     |         |            |            |            |            |       |   |       |    |       |        |       |       |       |        |       |        |        |        |       |        |        |       |       |      |  |  |  |  |  |  |  |  |  |  |  |  |  |  |  |  |  |  |  |  |  |  |  |  |  |  |  |  |  |  |  |  |  |  |  |  |  |  |  |  |  |  |  |  |  |  |  |  |  |  |  |  |  |  |  |  |  |  |  |  |  |  |  |  |  |  |  |  |  |  |  |  |  |  |  |  |  |  |  |  |  |  |  |  |  |  |  |  |  |  |  |  |  |  |  |  |  |  |  |  |  |  |  |  |  |  |  |  |  |  |  |  |  |  |  |  |  |  |  |  |  |  |  |  |  |  |  |  |  |  |  |  |  |  |  |  |  |  |  |  |  |  |  |  |  |  |  |  |  |  |  |  |  |  |  |  |  |  |  |  |  |  |  |  |  |  |  |  |  |  |  |  |  |  |  |  |  |  |  |  |  |  |  |  |  |  |  |  |  |  |  |  |  |  |  |  |  |  |  |  |  |  |  |  |  |  |  |  |  |  |  |  |  |  |  |  |  |  |  |  |  |  |  |  |  |  |  |  |  |  |  |  |  |  |  |  |  |  |  |  |  |  |  |  |  |  |  |  |  |  |  |  |  |  |  |  |  |  |  |  |  |  |  |  |  |  |  |  |  |  |  |  |  |  |  |  |  |  |  |  |  |  |  |  |  |  |  |  |  |  |  |  |  |  |  |  |  |  |  |  |  |  |  |  |  |  |  |  |  |  |  |  |  |  |  |  |  |  |  |  |  |  |  |  |  |  |  |  |  |  |  |  |  |  |  |  |  |  |  |  |  |  |  |  |  |  |  |  |  |  |  |  |  |  |  |  |  |  |  |  |  |  |  |  |  |  |  |  |  |  |  |  |  |  |  |  |  |  |  |  |  |  |  |  |  |  |  |  |  |  |  |  |  |  |  |  |  |  |  |  |  |  |  |  |  |  |  |  |  |  |  |  |  |  |  |  |  |  |  |  |  |  |  |  |  |  |  |  |  |  |  |  |  |  |  |  |  |  |  |  |  |  |  |  |  |  |  |  |  |  |  |  |  |  |  |  |  |  |  |  |  |  |  |  |  |  |  |  |  |  |  |  |  |  |  |  |  |  |  |  |  |  |  |  |  |  |  |  |  |  |  |  |  |  |  |  |  |  |  |  |  |  |  |  |  |  |  |  |  |  |  |  |  |  |  |  |  |  |  |  |  |  |  |  |  |  |  |  |  |  |  |  |  |  |  |  |  |  |  |  |  |  |  |  |  |  |  |  |  |  |  |  |  |  |  |  |  |  |  |  |  |  |  |  |  |  |  |  |  |  |  |  |  |  |  |  |  |  |  |  |  |  |  |  |  |  |  |  |  |  |  |  |  |  |  |  |  |  |  |  |  |  |  |  |  |  |  |  |  |  |  |  |  |  |  |  |  |  |  |  |  |  |  |  |  |  |  |  |  |  |  |  |  |  |  |  |  |  |  |  |  |  |  |  |  |  |  |  |  |  |  |  |  |  |  |  |  |  |  |  |  |  |  |  |  |  |  |  |  |  |  |  |  |  |  |  |  |  |  |  |  |  |  |  |  |  |  |  |  |  |  |  |  |  |  |  |  |  |  |  |  |  |  |  |  |  |  |  |  |  |  |  |  |  |  |  |  |  |  |  |  |  |  |  |  |  |  |  |  |  |  |  |  |  |  |  |  |  |  |  |  |  |  |  |  |  |  |  |  |  |  |  |  |  |  |  |  |  |  |  |  |  |  |  |  |  |  |  |  |  |  |  |  |  |  |  |  |  |  |  |  |  |  |  |  |  |  |  |  |  |  |  |  |  |  |  |  |  |  |  |  |  |  |  |  |  |  |  |  |  |  |  |  |  |  |  |  |  |  |  |  |  |  |  |  |  |  |  |  |    |
|----|---------------------|---------|------------|------------|------------|------------|-------|---|-------|----|-------|--------|-------|-------|-------|--------|-------|--------|--------|--------|-------|--------|--------|-------|-------|------|--|--|--|--|--|--|--|--|--|--|--|--|--|--|--|--|--|--|--|--|--|--|--|--|--|--|--|--|--|--|--|--|--|--|--|--|--|--|--|--|--|--|--|--|--|--|--|--|--|--|--|--|--|--|--|--|--|--|--|--|--|--|--|--|--|--|--|--|--|--|--|--|--|--|--|--|--|--|--|--|--|--|--|--|--|--|--|--|--|--|--|--|--|--|--|--|--|--|--|--|--|--|--|--|--|--|--|--|--|--|--|--|--|--|--|--|--|--|--|--|--|--|--|--|--|--|--|--|--|--|--|--|--|--|--|--|--|--|--|--|--|--|--|--|--|--|--|--|--|--|--|--|--|--|--|--|--|--|--|--|--|--|--|--|--|--|--|--|--|--|--|--|--|--|--|--|--|--|--|--|--|--|--|--|--|--|--|--|--|--|--|--|--|--|--|--|--|--|--|--|--|--|--|--|--|--|--|--|--|--|--|--|--|--|--|--|--|--|--|--|--|--|--|--|--|--|--|--|--|--|--|--|--|--|--|--|--|--|--|--|--|--|--|--|--|--|--|--|--|--|--|--|--|--|--|--|--|--|--|--|--|--|--|--|--|--|--|--|--|--|--|--|--|--|--|--|--|--|--|--|--|--|--|--|--|--|--|--|--|--|--|--|--|--|--|--|--|--|--|--|--|--|--|--|--|--|--|--|--|--|--|--|--|--|--|--|--|--|--|--|--|--|--|--|--|--|--|--|--|--|--|--|--|--|--|--|--|--|--|--|--|--|--|--|--|--|--|--|--|--|--|--|--|--|--|--|--|--|--|--|--|--|--|--|--|--|--|--|--|--|--|--|--|--|--|--|--|--|--|--|--|--|--|--|--|--|--|--|--|--|--|--|--|--|--|--|--|--|--|--|--|--|--|--|--|--|--|--|--|--|--|--|--|--|--|--|--|--|--|--|--|--|--|--|--|--|--|--|--|--|--|--|--|--|--|--|--|--|--|--|--|--|--|--|--|--|--|--|--|--|--|--|--|--|--|--|--|--|--|--|--|--|--|--|--|--|--|--|--|--|--|--|--|--|--|--|--|--|--|--|--|--|--|--|--|--|--|--|--|--|--|--|--|--|--|--|--|--|--|--|--|--|--|--|--|--|--|--|--|--|--|--|--|--|--|--|--|--|--|--|--|--|--|--|--|--|--|--|--|--|--|--|--|--|--|--|--|--|--|--|--|--|--|--|--|--|--|--|--|--|--|--|--|--|--|--|--|--|--|--|--|--|--|--|--|--|--|--|--|--|--|--|--|--|--|--|--|--|--|--|--|--|--|--|--|--|--|--|--|--|--|--|--|--|--|--|--|--|--|--|--|--|--|--|--|--|--|--|--|--|--|--|--|--|--|--|--|--|--|--|--|--|--|--|--|--|--|--|--|--|--|--|--|--|--|--|--|--|--|--|--|--|--|--|--|--|--|--|--|--|--|--|--|--|--|--|--|--|--|--|--|--|--|--|--|--|--|--|--|--|--|--|--|--|--|--|--|--|--|--|--|--|--|--|--|--|--|--|--|--|--|--|--|--|--|--|--|--|--|--|--|--|--|--|--|--|--|--|--|--|--|--|--|--|--|--|--|--|--|--|--|--|--|--|--|--|--|--|--|--|--|--|--|--|--|--|--|--|--|--|--|--|--|--|--|--|--|--|--|--|--|--|--|--|--|--|--|--|--|--|--|--|--|--|--|--|--|--|--|--|--|--|--|--|--|--|--|--|--|--|--|--|--|--|--|--|--|--|--|--|--|--|--|--|--|--|--|--|--|--|--|--|--|--|--|--|--|--|--|--|--|--|--|--|--|--|--|--|--|--|--|--|--|--|--|--|--|--|--|----|
| 44 | Cis-2-hexenol       | C6H12O  | ND         | ND         | ND         | ND         | 0.15  | ± | ND    | ND | ND    | ND     | ND    | 8.2   | ±     | ND     | ND    | 1.5    | ±      | 0.86±  | ND    | 10.71  | 8.79±  | ND    | 6.11  |      |  |  |  |  |  |  |  |  |  |  |  |  |  |  |  |  |  |  |  |  |  |  |  |  |  |  |  |  |  |  |  |  |  |  |  |  |  |  |  |  |  |  |  |  |  |  |  |  |  |  |  |  |  |  |  |  |  |  |  |  |  |  |  |  |  |  |  |  |  |  |  |  |  |  |  |  |  |  |  |  |  |  |  |  |  |  |  |  |  |  |  |  |  |  |  |  |  |  |  |  |  |  |  |  |  |  |  |  |  |  |  |  |  |  |  |  |  |  |  |  |  |  |  |  |  |  |  |  |  |  |  |  |  |  |  |  |  |  |  |  |  |  |  |  |  |  |  |  |  |  |  |  |  |  |  |  |  |  |  |  |  |  |  |  |  |  |  |  |  |  |  |  |  |  |  |  |  |  |  |  |  |  |  |  |  |  |  |  |  |  |  |  |  |  |  |  |  |  |  |  |  |  |  |  |  |  |  |  |  |  |  |  |  |  |  |  |  |  |  |  |  |  |  |  |  |  |  |  |  |  |  |  |  |  |  |  |  |  |  |  |  |  |  |  |  |  |  |  |  |  |  |  |  |  |  |  |  |  |  |  |  |  |  |  |  |  |  |  |  |  |  |  |  |  |  |  |  |  |  |  |  |  |  |  |  |  |  |  |  |  |  |  |  |  |  |  |  |  |  |  |  |  |  |  |  |  |  |  |  |  |  |  |  |  |  |  |  |  |  |  |  |  |  |  |  |  |  |  |  |  |  |  |  |  |  |  |  |  |  |  |  |  |  |  |  |  |  |  |  |  |  |  |  |  |  |  |  |  |  |  |  |  |  |  |  |  |  |  |  |  |  |  |  |  |  |  |  |  |  |  |  |  |  |  |  |  |  |  |  |  |  |  |  |  |  |  |  |  |  |  |  |  |  |  |  |  |  |  |  |  |  |  |  |  |  |  |  |  |  |  |  |  |  |  |  |  |  |  |  |  |  |  |  |  |  |  |  |  |  |  |  |  |  |  |  |  |  |  |  |  |  |  |  |  |  |  |  |  |  |  |  |  |  |  |  |  |  |  |  |  |  |  |  |  |  |  |  |  |  |  |  |  |  |  |  |  |  |  |  |  |  |  |  |  |  |  |  |  |  |  |  |  |  |  |  |  |  |  |  |  |  |  |  |  |  |  |  |  |  |  |  |  |  |  |  |  |  |  |  |  |  |  |  |  |  |  |  |  |  |  |  |  |  |  |  |  |  |  |  |  |  |  |  |  |  |  |  |  |  |  |  |  |  |  |  |  |  |  |  |  |  |  |  |  |  |  |  |  |  |  |  |  |  |  |  |  |  |  |  |  |  |  |  |  |  |  |  |  |  |  |  |  |  |  |  |  |  |  |  |  |  |  |  |  |  |  |  |  |  |  |  |  |  |  |  |  |  |  |  |  |  |  |  |  |  |  |  |  |  |  |  |  |  |  |  |  |  |  |  |  |  |  |  |  |  |  |  |  |  |  |  |  |  |  |  |  |  |  |  |  |  |  |  |  |  |  |  |  |  |  |  |  |  |  |  |  |  |  |  |  |  |  |  |  |  |  |  |  |  |  |  |  |  |  |  |  |  |  |  |  |  |  |  |  |  |  |  |  |  |  |  |  |  |  |  |  |  |  |  |  |  |  |  |  |  |  |  |  |  |  |  |  |  |  |  |  |  |  |  |  |  |  |  |  |  |  |  |  |  |  |  |  |  |  |  |  |  |  |  |  |  |  |  |  |  |  |  |  |  |  |  |  |  |  |  |  |  |  |  |  |  |  |  |  |  |  |  |  |  |  |  |  |  |  |  |  |  |  |  |  |  |  |  |  |  |  |  |  |  |  |  |  |  |  |  |  |  |  |  |    |
|    |                     |         |            |            |            |            | 0.07a |   |       |    |       |        |       | 3.1a  |       |        |       | 0.65a  | 0.29b  |        | ±     | 1.81b  |        | ±     |       |      |  |  |  |  |  |  |  |  |  |  |  |  |  |  |  |  |  |  |  |  |  |  |  |  |  |  |  |  |  |  |  |  |  |  |  |  |  |  |  |  |  |  |  |  |  |  |  |  |  |  |  |  |  |  |  |  |  |  |  |  |  |  |  |  |  |  |  |  |  |  |  |  |  |  |  |  |  |  |  |  |  |  |  |  |  |  |  |  |  |  |  |  |  |  |  |  |  |  |  |  |  |  |  |  |  |  |  |  |  |  |  |  |  |  |  |  |  |  |  |  |  |  |  |  |  |  |  |  |  |  |  |  |  |  |  |  |  |  |  |  |  |  |  |  |  |  |  |  |  |  |  |  |  |  |  |  |  |  |  |  |  |  |  |  |  |  |  |  |  |  |  |  |  |  |  |  |  |  |  |  |  |  |  |  |  |  |  |  |  |  |  |  |  |  |  |  |  |  |  |  |  |  |  |  |  |  |  |  |  |  |  |  |  |  |  |  |  |  |  |  |  |  |  |  |  |  |  |  |  |  |  |  |  |  |  |  |  |  |  |  |  |  |  |  |  |  |  |  |  |  |  |  |  |  |  |  |  |  |  |  |  |  |  |  |  |  |  |  |  |  |  |  |  |  |  |  |  |  |  |  |  |  |  |  |  |  |  |  |  |  |  |  |  |  |  |  |  |  |  |  |  |  |  |  |  |  |  |  |  |  |  |  |  |  |  |  |  |  |  |  |  |  |  |  |  |  |  |  |  |  |  |  |  |  |  |  |  |  |  |  |  |  |  |  |  |  |  |  |  |  |  |  |  |  |  |  |  |  |  |  |  |  |  |  |  |  |  |  |  |  |  |  |  |  |  |  |  |  |  |  |  |  |  |  |  |  |  |  |  |  |  |  |  |  |  |  |  |  |  |  |  |  |  |  |  |  |  |  |  |  |  |  |  |  |  |  |  |  |  |  |  |  |  |  |  |  |  |  |  |  |  |  |  |  |  |  |  |  |  |  |  |  |  |  |  |  |  |  |  |  |  |  |  |  |  |  |  |  |  |  |  |  |  |  |  |  |  |  |  |  |  |  |  |  |  |  |  |  |  |  |  |  |  |  |  |  |  |  |  |  |  |  |  |  |  |  |  |  |  |  |  |  |  |  |  |  |  |  |  |  |  |  |  |  |  |  |  |  |  |  |  |  |  |  |  |  |  |  |  |  |  |  |  |  |  |  |  |  |  |  |  |  |  |  |  |  |  |  |  |  |  |  |  |  |  |  |  |  |  |  |  |  |  |  |  |  |  |  |  |  |  |  |  |  |  |  |  |  |  |  |  |  |  |  |  |  |  |  |  |  |  |  |  |  |  |  |  |  |  |  |  |  |  |  |  |  |  |  |  |  |  |  |  |  |  |  |  |  |  |  |  |  |  |  |  |  |  |  |  |  |  |  |  |  |  |  |  |  |  |  |  |  |  |  |  |  |  |  |  |  |  |  |  |  |  |  |  |  |  |  |  |  |  |  |  |  |  |  |  |  |  |  |  |  |  |  |  |  |  |  |  |  |  |  |  |  |  |  |  |  |  |  |  |  |  |  |  |  |  |  |  |  |  |  |  |  |  |  |  |  |  |  |  |  |  |  |  |  |  |  |  |  |  |  |  |  |  |  |  |  |  |  |  |  |  |  |  |  |  |  |  |  |  |  |  |  |  |  |  |  |  |  |  |  |  |  |  |  |  |  |  |  |  |  |  |  |  |  |  |  |  |  |  |  |  |  |  |  |  |  |  |  |  |  |  |  |  |  |  |  |  |  |  |  |  |  |  |  |  |  |  |  |  |  |  |  |  |  |  |  |  |  |  |  |  |  |  |  |  |  |  |  |  |  |  |  |  |  |  |    |
|    |                     |         |            |            |            |            |       |   |       |    |       |        |       |       |       |        |       |        |        |        | 2.17a |        |        | 1.93c |       |      |  |  |  |  |  |  |  |  |  |  |  |  |  |  |  |  |  |  |  |  |  |  |  |  |  |  |  |  |  |  |  |  |  |  |  |  |  |  |  |  |  |  |  |  |  |  |  |  |  |  |  |  |  |  |  |  |  |  |  |  |  |  |  |  |  |  |  |  |  |  |  |  |  |  |  |  |  |  |  |  |  |  |  |  |  |  |  |  |  |  |  |  |  |  |  |  |  |  |  |  |  |  |  |  |  |  |  |  |  |  |  |  |  |  |  |  |  |  |  |  |  |  |  |  |  |  |  |  |  |  |  |  |  |  |  |  |  |  |  |  |  |  |  |  |  |  |  |  |  |  |  |  |  |  |  |  |  |  |  |  |  |  |  |  |  |  |  |  |  |  |  |  |  |  |  |  |  |  |  |  |  |  |  |  |  |  |  |  |  |  |  |  |  |  |  |  |  |  |  |  |  |  |  |  |  |  |  |  |  |  |  |  |  |  |  |  |  |  |  |  |  |  |  |  |  |  |  |  |  |  |  |  |  |  |  |  |  |  |  |  |  |  |  |  |  |  |  |  |  |  |  |  |  |  |  |  |  |  |  |  |  |  |  |  |  |  |  |  |  |  |  |  |  |  |  |  |  |  |  |  |  |  |  |  |  |  |  |  |  |  |  |  |  |  |  |  |  |  |  |  |  |  |  |  |  |  |  |  |  |  |  |  |  |  |  |  |  |  |  |  |  |  |  |  |  |  |  |  |  |  |  |  |  |  |  |  |  |  |  |  |  |  |  |  |  |  |  |  |  |  |  |  |  |  |  |  |  |  |  |  |  |  |  |  |  |  |  |  |  |  |  |  |  |  |  |  |  |  |  |  |  |  |  |  |  |  |  |  |  |  |  |  |  |  |  |  |  |  |  |  |  |  |  |  |  |  |  |  |  |  |  |  |  |  |  |  |  |  |  |  |  |  |  |  |  |  |  |  |  |  |  |  |  |  |  |  |  |  |  |  |  |  |  |  |  |  |  |  |  |  |  |  |  |  |  |  |  |  |  |  |  |  |  |  |  |  |  |  |  |  |  |  |  |  |  |  |  |  |  |  |  |  |  |  |  |  |  |  |  |  |  |  |  |  |  |  |  |  |  |  |  |  |  |  |  |  |  |  |  |  |  |  |  |  |  |  |  |  |  |  |  |  |  |  |  |  |  |  |  |  |  |  |  |  |  |  |  |  |  |  |  |  |  |  |  |  |  |  |  |  |  |  |  |  |  |  |  |  |  |  |  |  |  |  |  |  |  |  |  |  |  |  |  |  |  |  |  |  |  |  |  |  |  |  |  |  |  |  |  |  |  |  |  |  |  |  |  |  |  |  |  |  |  |  |  |  |  |  |  |  |  |  |  |  |  |  |  |  |  |  |  |  |  |  |  |  |  |  |  |  |  |  |  |  |  |  |  |  |  |  |  |  |  |  |  |  |  |  |  |  |  |  |  |  |  |  |  |  |  |  |  |  |  |  |  |  |  |  |  |  |  |  |  |  |  |  |  |  |  |  |  |  |  |  |  |  |  |  |  |  |  |  |  |  |  |  |  |  |  |  |  |  |  |  |  |  |  |  |  |  |  |  |  |  |  |  |  |  |  |  |  |  |  |  |  |  |  |  |  |  |  |  |  |  |  |  |  |  |  |  |  |  |  |  |  |  |  |  |  |  |  |  |  |  |  |  |  |  |  |  |  |  |  |  |  |  |  |  |  |  |  |  |  |  |  |  |  |  |  |  |  |  |  |  |  |  |  |  |  |  |  |  |  |  |  |  |  |  |  |  |  |  |  |  |  |  |  |  |  |  |  |  |  |  |  |  |  |  |  |  |  |  |  |  |  |  |  |  |  |    |
| 45 | Methyl formate      | C9H18O2 | 0.35±0.17d | 0.64±0.29b | 1.05±0.43a | 0.49±0.18c | 0.21  | ± | 0.39  | ±  | 0.3   | ±      | 0.55± | 0.45± | 0.44  | 0.11±  | 0.42± | 0.19   | 0.29±  | 0.31±  | 0.25± | 1.53   | 0.42±  | 1.11± | 0.99  |      |  |  |  |  |  |  |  |  |  |  |  |  |  |  |  |  |  |  |  |  |  |  |  |  |  |  |  |  |  |  |  |  |  |  |  |  |  |  |  |  |  |  |  |  |  |  |  |  |  |  |  |  |  |  |  |  |  |  |  |  |  |  |  |  |  |  |  |  |  |  |  |  |  |  |  |  |  |  |  |  |  |  |  |  |  |  |  |  |  |  |  |  |  |  |  |  |  |  |  |  |  |  |  |  |  |  |  |  |  |  |  |  |  |  |  |  |  |  |  |  |  |  |  |  |  |  |  |  |  |  |  |  |  |  |  |  |  |  |  |  |  |  |  |  |  |  |  |  |  |  |  |  |  |  |  |  |  |  |  |  |  |  |  |  |  |  |  |  |  |  |  |  |  |  |  |  |  |  |  |  |  |  |  |  |  |  |  |  |  |  |  |  |  |  |  |  |  |  |  |  |  |  |  |  |  |  |  |  |  |  |  |  |  |  |  |  |  |  |  |  |  |  |  |  |  |  |  |  |  |  |  |  |  |  |  |  |  |  |  |  |  |  |  |  |  |  |  |  |  |  |  |  |  |  |  |  |  |  |  |  |  |  |  |  |  |  |  |  |  |  |  |  |  |  |  |  |  |  |  |  |  |  |  |  |  |  |  |  |  |  |  |  |  |  |  |  |  |  |  |  |  |  |  |  |  |  |  |  |  |  |  |  |  |  |  |  |  |  |  |  |  |  |  |  |  |  |  |  |  |  |  |  |  |  |  |  |  |  |  |  |  |  |  |  |  |  |  |  |  |  |  |  |  |  |  |  |  |  |  |  |  |  |  |  |  |  |  |  |  |  |  |  |  |  |  |  |  |  |  |  |  |  |  |  |  |  |  |  |  |  |  |  |  |  |  |  |  |  |  |  |  |  |  |  |  |  |  |  |  |  |  |  |  |  |  |  |  |  |  |  |  |  |  |  |  |  |  |  |  |  |  |  |  |  |  |  |  |  |  |  |  |  |  |  |  |  |  |  |  |  |  |  |  |  |  |  |  |  |  |  |  |  |  |  |  |  |  |  |  |  |  |  |  |  |  |  |  |  |  |  |  |  |  |  |  |  |  |  |  |  |  |  |  |  |  |  |  |  |  |  |  |  |  |  |  |  |  |  |  |  |  |  |  |  |  |  |  |  |  |  |  |  |  |  |  |  |  |  |  |  |  |  |  |  |  |  |  |  |  |  |  |  |  |  |  |  |  |  |  |  |  |  |  |  |  |  |  |  |  |  |  |  |  |  |  |  |  |  |  |  |  |  |  |  |  |  |  |  |  |  |  |  |  |  |  |  |  |  |  |  |  |  |  |  |  |  |  |  |  |  |  |  |  |  |  |  |  |  |  |  |  |  |  |  |  |  |  |  |  |  |  |  |  |  |  |  |  |  |  |  |  |  |  |  |  |  |  |  |  |  |  |  |  |  |  |  |  |  |  |  |  |  |  |  |  |  |  |  |  |  |  |  |  |  |  |  |  |  |  |  |  |  |  |  |  |  |  |  |  |  |  |  |  |  |  |  |  |  |  |  |  |  |  |  |  |  |  |  |  |  |  |  |  |  |  |  |  |  |  |  |  |  |  |  |  |  |  |  |  |  |  |  |  |  |  |  |  |  |  |  |  |  |  |  |  |  |  |  |  |  |  |  |  |  |  |  |  |  |  |  |  |  |  |  |  |  |  |  |  |  |  |  |  |  |  |  |  |  |  |  |  |  |  |  |  |  |  |  |  |  |  |  |  |  |  |  |  |  |  |  |  |  |  |  |  |  |  |  |  |  |  |  |  |  |  |  |  |  |  |  |  |  |  |  |  |  |  |  |  |  |  |  |  |  |  |  |  |  |  |    |
|    |                     |         |            |            |            |            | 0.11d |   | 0.17b |    | 0.21c | 0.2a   | 0.32a | ±     | 0.1c  | 0.13b  | ±     | 0.04b  | 0.11a  | 0.08c  | ±     | 0.32d  | 0.61b  | ±     |       |      |  |  |  |  |  |  |  |  |  |  |  |  |  |  |  |  |  |  |  |  |  |  |  |  |  |  |  |  |  |  |  |  |  |  |  |  |  |  |  |  |  |  |  |  |  |  |  |  |  |  |  |  |  |  |  |  |  |  |  |  |  |  |  |  |  |  |  |  |  |  |  |  |  |  |  |  |  |  |  |  |  |  |  |  |  |  |  |  |  |  |  |  |  |  |  |  |  |  |  |  |  |  |  |  |  |  |  |  |  |  |  |  |  |  |  |  |  |  |  |  |  |  |  |  |  |  |  |  |  |  |  |  |  |  |  |  |  |  |  |  |  |  |  |  |  |  |  |  |  |  |  |  |  |  |  |  |  |  |  |  |  |  |  |  |  |  |  |  |  |  |  |  |  |  |  |  |  |  |  |  |  |  |  |  |  |  |  |  |  |  |  |  |  |  |  |  |  |  |  |  |  |  |  |  |  |  |  |  |  |  |  |  |  |  |  |  |  |  |  |  |  |  |  |  |  |  |  |  |  |  |  |  |  |  |  |  |  |  |  |  |  |  |  |  |  |  |  |  |  |  |  |  |  |  |  |  |  |  |  |  |  |  |  |  |  |  |  |  |  |  |  |  |  |  |  |  |  |  |  |  |  |  |  |  |  |  |  |  |  |  |  |  |  |  |  |  |  |  |  |  |  |  |  |  |  |  |  |  |  |  |  |  |  |  |  |  |  |  |  |  |  |  |  |  |  |  |  |  |  |  |  |  |  |  |  |  |  |  |  |  |  |  |  |  |  |  |  |  |  |  |  |  |  |  |  |  |  |  |  |  |  |  |  |  |  |  |  |  |  |  |  |  |  |  |  |  |  |  |  |  |  |  |  |  |  |  |  |  |  |  |  |  |  |  |  |  |  |  |  |  |  |  |  |  |  |  |  |  |  |  |  |  |  |  |  |  |  |  |  |  |  |  |  |  |  |  |  |  |  |  |  |  |  |  |  |  |  |  |  |  |  |  |  |  |  |  |  |  |  |  |  |  |  |  |  |  |  |  |  |  |  |  |  |  |  |  |  |  |  |  |  |  |  |  |  |  |  |  |  |  |  |  |  |  |  |  |  |  |  |  |  |  |  |  |  |  |  |  |  |  |  |  |  |  |  |  |  |  |  |  |  |  |  |  |  |  |  |  |  |  |  |  |  |  |  |  |  |  |  |  |  |  |  |  |  |  |  |  |  |  |  |  |  |  |  |  |  |  |  |  |  |  |  |  |  |  |  |  |  |  |  |  |  |  |  |  |  |  |  |  |  |  |  |  |  |  |  |  |  |  |  |  |  |  |  |  |  |  |  |  |  |  |  |  |  |  |  |  |  |  |  |  |  |  |  |  |  |  |  |  |  |  |  |  |  |  |  |  |  |  |  |  |  |  |  |  |  |  |  |  |  |  |  |  |  |  |  |  |  |  |  |  |  |  |  |  |  |  |  |  |  |  |  |  |  |  |  |  |  |  |  |  |  |  |  |  |  |  |  |  |  |  |  |  |  |  |  |  |  |  |  |  |  |  |  |  |  |  |  |  |  |  |  |  |  |  |  |  |  |  |  |  |  |  |  |  |  |  |  |  |  |  |  |  |  |  |  |  |  |  |  |  |  |  |  |  |  |  |  |  |  |  |  |  |  |  |  |  |  |  |  |  |  |  |  |  |  |  |  |  |  |  |  |  |  |  |  |  |  |  |  |  |  |  |  |  |  |  |  |  |  |  |  |  |  |  |  |  |  |  |  |  |  |  |  |  |  |  |  |  |  |  |  |  |  |  |  |  |  |  |  |  |  |  |  |  |  |  |  |  |  |  |  |  |  |  |  |  |  |  |  |  |  |  |  |  |  |  |  |    |
|    |                     |         |            |            |            |            |       |   |       |    |       |        | 0.18a |       |       |        | 0.11d |        |        |        | 0.43a |        |        | 0.27c |       |      |  |  |  |  |  |  |  |  |  |  |  |  |  |  |  |  |  |  |  |  |  |  |  |  |  |  |  |  |  |  |  |  |  |  |  |  |  |  |  |  |  |  |  |  |  |  |  |  |  |  |  |  |  |  |  |  |  |  |  |  |  |  |  |  |  |  |  |  |  |  |  |  |  |  |  |  |  |  |  |  |  |  |  |  |  |  |  |  |  |  |  |  |  |  |  |  |  |  |  |  |  |  |  |  |  |  |  |  |  |  |  |  |  |  |  |  |  |  |  |  |  |  |  |  |  |  |  |  |  |  |  |  |  |  |  |  |  |  |  |  |  |  |  |  |  |  |  |  |  |  |  |  |  |  |  |  |  |  |  |  |  |  |  |  |  |  |  |  |  |  |  |  |  |  |  |  |  |  |  |  |  |  |  |  |  |  |  |  |  |  |  |  |  |  |  |  |  |  |  |  |  |  |  |  |  |  |  |  |  |  |  |  |  |  |  |  |  |  |  |  |  |  |  |  |  |  |  |  |  |  |  |  |  |  |  |  |  |  |  |  |  |  |  |  |  |  |  |  |  |  |  |  |  |  |  |  |  |  |  |  |  |  |  |  |  |  |  |  |  |  |  |  |  |  |  |  |  |  |  |  |  |  |  |  |  |  |  |  |  |  |  |  |  |  |  |  |  |  |  |  |  |  |  |  |  |  |  |  |  |  |  |  |  |  |  |  |  |  |  |  |  |  |  |  |  |  |  |  |  |  |  |  |  |  |  |  |  |  |  |  |  |  |  |  |  |  |  |  |  |  |  |  |  |  |  |  |  |  |  |  |  |  |  |  |  |  |  |  |  |  |  |  |  |  |  |  |  |  |  |  |  |  |  |  |  |  |  |  |  |  |  |  |  |  |  |  |  |  |  |  |  |  |  |  |  |  |  |  |  |  |  |  |  |  |  |  |  |  |  |  |  |  |  |  |  |  |  |  |  |  |  |  |  |  |  |  |  |  |  |  |  |  |  |  |  |  |  |  |  |  |  |  |  |  |  |  |  |  |  |  |  |  |  |  |  |  |  |  |  |  |  |  |  |  |  |  |  |  |  |  |  |  |  |  |  |  |  |  |  |  |  |  |  |  |  |  |  |  |  |  |  |  |  |  |  |  |  |  |  |  |  |  |  |  |  |  |  |  |  |  |  |  |  |  |  |  |  |  |  |  |  |  |  |  |  |  |  |  |  |  |  |  |  |  |  |  |  |  |  |  |  |  |  |  |  |  |  |  |  |  |  |  |  |  |  |  |  |  |  |  |  |  |  |  |  |  |  |  |  |  |  |  |  |  |  |  |  |  |  |  |  |  |  |  |  |  |  |  |  |  |  |  |  |  |  |  |  |  |  |  |  |  |  |  |  |  |  |  |  |  |  |  |  |  |  |  |  |  |  |  |  |  |  |  |  |  |  |  |  |  |  |  |  |  |  |  |  |  |  |  |  |  |  |  |  |  |  |  |  |  |  |  |  |  |  |  |  |  |  |  |  |  |  |  |  |  |  |  |  |  |  |  |  |  |  |  |  |  |  |  |  |  |  |  |  |  |  |  |  |  |  |  |  |  |  |  |  |  |  |  |  |  |  |  |  |  |  |  |  |  |  |  |  |  |  |  |  |  |  |  |  |  |  |  |  |  |  |  |  |  |  |  |  |  |  |  |  |  |  |  |  |  |  |  |  |  |  |  |  |  |  |  |  |  |  |  |  |  |  |  |  |  |  |  |  |  |  |  |  |  |  |  |  |  |  |  |  |  |  |  |  |  |  |  |  |  |  |  |  |  |  |  |  |  |  |  |  |  |  |  |  |  |  |  |  |  |  |  |  |  |  |  |  |  |  |  |  |  |  |    |
| 46 | Ethyl formate       | C3H6O2  | 0.4±0.1b   | 0.27±0.12b | 0.4±0.2b   | 1.03±0.34a | 0.24  | ± | 0.22  | ±  | 0.55± | 0.83±  | 0.23± | 0.48  | 0.88± | 0.81±  | 0.29  | 0.54±  | 0.53±  | 0.35±  | 1.99  | 0.48±  | 0.71±  | 1.38  |       |      |  |  |  |  |  |  |  |  |  |  |  |  |  |  |  |  |  |  |  |  |  |  |  |  |  |  |  |  |  |  |  |  |  |  |  |  |  |  |  |  |  |  |  |  |  |  |  |  |  |  |  |  |  |  |  |  |  |  |  |  |  |  |  |  |  |  |  |  |  |  |  |  |  |  |  |  |  |  |  |  |  |  |  |  |  |  |  |  |  |  |  |  |  |  |  |  |  |  |  |  |  |  |  |  |  |  |  |  |  |  |  |  |  |  |  |  |  |  |  |  |  |  |  |  |  |  |  |  |  |  |  |  |  |  |  |  |  |  |  |  |  |  |  |  |  |  |  |  |  |  |  |  |  |  |  |  |  |  |  |  |  |  |  |  |  |  |  |  |  |  |  |  |  |  |  |  |  |  |  |  |  |  |  |  |  |  |  |  |  |  |  |  |  |  |  |  |  |  |  |  |  |  |  |  |  |  |  |  |  |  |  |  |  |  |  |  |  |  |  |  |  |  |  |  |  |  |  |  |  |  |  |  |  |  |  |  |  |  |  |  |  |  |  |  |  |  |  |  |  |  |  |  |  |  |  |  |  |  |  |  |  |  |  |  |  |  |  |  |  |  |  |  |  |  |  |  |  |  |  |  |  |  |  |  |  |  |  |  |  |  |  |  |  |  |  |  |  |  |  |  |  |  |  |  |  |  |  |  |  |  |  |  |  |  |  |  |  |  |  |  |  |  |  |  |  |  |  |  |  |  |  |  |  |  |  |  |  |  |  |  |  |  |  |  |  |  |  |  |  |  |  |  |  |  |  |  |  |  |  |  |  |  |  |  |  |  |  |  |  |  |  |  |  |  |  |  |  |  |  |  |  |  |  |  |  |  |  |  |  |  |  |  |  |  |  |  |  |  |  |  |  |  |  |  |  |  |  |  |  |  |  |  |  |  |  |  |  |  |  |  |  |  |  |  |  |  |  |  |  |  |  |  |  |  |  |  |  |  |  |  |  |  |  |  |  |  |  |  |  |  |  |  |  |  |  |  |  |  |  |  |  |  |  |  |  |  |  |  |  |  |  |  |  |  |  |  |  |  |  |  |  |  |  |  |  |  |  |  |  |  |  |  |  |  |  |  |  |  |  |  |  |  |  |  |  |  |  |  |  |  |  |  |  |  |  |  |  |  |  |  |  |  |  |  |  |  |  |  |  |  |  |  |  |  |  |  |  |  |  |  |  |  |  |  |  |  |  |  |  |  |  |  |  |  |  |  |  |  |  |  |  |  |  |  |  |  |  |  |  |  |  |  |  |  |  |  |  |  |  |  |  |  |  |  |  |  |  |  |  |  |  |  |  |  |  |  |  |  |  |  |  |  |  |  |  |  |  |  |  |  |  |  |  |  |  |  |  |  |  |  |  |  |  |  |  |  |  |  |  |  |  |  |  |  |  |  |  |  |  |  |  |  |  |  |  |  |  |  |  |  |  |  |  |  |  |  |  |  |  |  |  |  |  |  |  |  |  |  |  |  |  |  |  |  |  |  |  |  |  |  |  |  |  |  |  |  |  |  |  |  |  |  |  |  |  |  |  |  |  |  |  |  |  |  |  |  |  |  |  |  |  |  |  |  |  |  |  |  |  |  |  |  |  |  |  |  |  |  |  |  |  |  |  |  |  |  |  |  |  |  |  |  |  |  |  |  |  |  |  |  |  |  |  |  |  |  |  |  |  |  |  |  |  |  |  |  |  |  |  |  |  |  |  |  |  |  |  |  |  |  |  |  |  |  |  |  |  |  |  |  |  |  |  |  |  |  |  |  |  |  |  |  |  |  |  |  |  |  |  |  |  |  |  |  |  |  |  |  |  |  |  |  |  |  |  |  |  |  |  |    |
|    |                     |         |            |            |            |            | 0.11c |   | 0.04d |    | 0.17b | 0.2a   | 0.04d | ±     | 0.18a | 0.23b  | ±     | 0.21a  | 0.11a  | 0.1b   | ±     | 0.2d   | 0.13c  | ±     |       |      |  |  |  |  |  |  |  |  |  |  |  |  |  |  |  |  |  |  |  |  |  |  |  |  |  |  |  |  |  |  |  |  |  |  |  |  |  |  |  |  |  |  |  |  |  |  |  |  |  |  |  |  |  |  |  |  |  |  |  |  |  |  |  |  |  |  |  |  |  |  |  |  |  |  |  |  |  |  |  |  |  |  |  |  |  |  |  |  |  |  |  |  |  |  |  |  |  |  |  |  |  |  |  |  |  |  |  |  |  |  |  |  |  |  |  |  |  |  |  |  |  |  |  |  |  |  |  |  |  |  |  |  |  |  |  |  |  |  |  |  |  |  |  |  |  |  |  |  |  |  |  |  |  |  |  |  |  |  |  |  |  |  |  |  |  |  |  |  |  |  |  |  |  |  |  |  |  |  |  |  |  |  |  |  |  |  |  |  |  |  |  |  |  |  |  |  |  |  |  |  |  |  |  |  |  |  |  |  |  |  |  |  |  |  |  |  |  |  |  |  |  |  |  |  |  |  |  |  |  |  |  |  |  |  |  |  |  |  |  |  |  |  |  |  |  |  |  |  |  |  |  |  |  |  |  |  |  |  |  |  |  |  |  |  |  |  |  |  |  |  |  |  |  |  |  |  |  |  |  |  |  |  |  |  |  |  |  |  |  |  |  |  |  |  |  |  |  |  |  |  |  |  |  |  |  |  |  |  |  |  |  |  |  |  |  |  |  |  |  |  |  |  |  |  |  |  |  |  |  |  |  |  |  |  |  |  |  |  |  |  |  |  |  |  |  |  |  |  |  |  |  |  |  |  |  |  |  |  |  |  |  |  |  |  |  |  |  |  |  |  |  |  |  |  |  |  |  |  |  |  |  |  |  |  |  |  |  |  |  |  |  |  |  |  |  |  |  |  |  |  |  |  |  |  |  |  |  |  |  |  |  |  |  |  |  |  |  |  |  |  |  |  |  |  |  |  |  |  |  |  |  |  |  |  |  |  |  |  |  |  |  |  |  |  |  |  |  |  |  |  |  |  |  |  |  |  |  |  |  |  |  |  |  |  |  |  |  |  |  |  |  |  |  |  |  |  |  |  |  |  |  |  |  |  |  |  |  |  |  |  |  |  |  |  |  |  |  |  |  |  |  |  |  |  |  |  |  |  |  |  |  |  |  |  |  |  |  |  |  |  |  |  |  |  |  |  |  |  |  |  |  |  |  |  |  |  |  |  |  |  |  |  |  |  |  |  |  |  |  |  |  |  |  |  |  |  |  |  |  |  |  |  |  |  |  |  |  |  |  |  |  |  |  |  |  |  |  |  |  |  |  |  |  |  |  |  |  |  |  |  |  |  |  |  |  |  |  |  |  |  |  |  |  |  |  |  |  |  |  |  |  |  |  |  |  |  |  |  |  |  |  |  |  |  |  |  |  |  |  |  |  |  |  |  |  |  |  |  |  |  |  |  |  |  |  |  |  |  |  |  |  |  |  |  |  |  |  |  |  |  |  |  |  |  |  |  |  |  |  |  |  |  |  |  |  |  |  |  |  |  |  |  |  |  |  |  |  |  |  |  |  |  |  |  |  |  |  |  |  |  |  |  |  |  |  |  |  |  |  |  |  |  |  |  |  |  |  |  |  |  |  |  |  |  |  |  |  |  |  |  |  |  |  |  |  |  |  |  |  |  |  |  |  |  |  |  |  |  |  |  |  |  |  |  |  |  |  |  |  |  |  |  |  |  |  |  |  |  |  |  |  |  |  |  |  |  |  |  |  |  |  |  |  |  |  |  |  |  |  |  |  |  |  |  |  |  |  |  |  |  |  |  |  |  |  |  |  |  |  |  |  |  |  |  |  |  |  |  |  |  |  |  |  |  |  |  |  |  |  |    |
|    |                     |         |            |            |            |            |       |   |       |    |       |        | 0.12c |       |       | 0.16c  |       |        |        |        | 0.67a |        |        | 0.68b |       |      |  |  |  |  |  |  |  |  |  |  |  |  |  |  |  |  |  |  |  |  |  |  |  |  |  |  |  |  |  |  |  |  |  |  |  |  |  |  |  |  |  |  |  |  |  |  |  |  |  |  |  |  |  |  |  |  |  |  |  |  |  |  |  |  |  |  |  |  |  |  |  |  |  |  |  |  |  |  |  |  |  |  |  |  |  |  |  |  |  |  |  |  |  |  |  |  |  |  |  |  |  |  |  |  |  |  |  |  |  |  |  |  |  |  |  |  |  |  |  |  |  |  |  |  |  |  |  |  |  |  |  |  |  |  |  |  |  |  |  |  |  |  |  |  |  |  |  |  |  |  |  |  |  |  |  |  |  |  |  |  |  |  |  |  |  |  |  |  |  |  |  |  |  |  |  |  |  |  |  |  |  |  |  |  |  |  |  |  |  |  |  |  |  |  |  |  |  |  |  |  |  |  |  |  |  |  |  |  |  |  |  |  |  |  |  |  |  |  |  |  |  |  |  |  |  |  |  |  |  |  |  |  |  |  |  |  |  |  |  |  |  |  |  |  |  |  |  |  |  |  |  |  |  |  |  |  |  |  |  |  |  |  |  |  |  |  |  |  |  |  |  |  |  |  |  |  |  |  |  |  |  |  |  |  |  |  |  |  |  |  |  |  |  |  |  |  |  |  |  |  |  |  |  |  |  |  |  |  |  |  |  |  |  |  |  |  |  |  |  |  |  |  |  |  |  |  |  |  |  |  |  |  |  |  |  |  |  |  |  |  |  |  |  |  |  |  |  |  |  |  |  |  |  |  |  |  |  |  |  |  |  |  |  |  |  |  |  |  |  |  |  |  |  |  |  |  |  |  |  |  |  |  |  |  |  |  |  |  |  |  |  |  |  |  |  |  |  |  |  |  |  |  |  |  |  |  |  |  |  |  |  |  |  |  |  |  |  |  |  |  |  |  |  |  |  |  |  |  |  |  |  |  |  |  |  |  |  |  |  |  |  |  |  |  |  |  |  |  |  |  |  |  |  |  |  |  |  |  |  |  |  |  |  |  |  |  |  |  |  |  |  |  |  |  |  |  |  |  |  |  |  |  |  |  |  |  |  |  |  |  |  |  |  |  |  |  |  |  |  |  |  |  |  |  |  |  |  |  |  |  |  |  |  |  |  |  |  |  |  |  |  |  |  |  |  |  |  |  |  |  |  |  |  |  |  |  |  |  |  |  |  |  |  |  |  |  |  |  |  |  |  |  |  |  |  |  |  |  |  |  |  |  |  |  |  |  |  |  |  |  |  |  |  |  |  |  |  |  |  |  |  |  |  |  |  |  |  |  |  |  |  |  |  |  |  |  |  |  |  |  |  |  |  |  |  |  |  |  |  |  |  |  |  |  |  |  |  |  |  |  |  |  |  |  |  |  |  |  |  |  |  |  |  |  |  |  |  |  |  |  |  |  |  |  |  |  |  |  |  |  |  |  |  |  |  |  |  |  |  |  |  |  |  |  |  |  |  |  |  |  |  |  |  |  |  |  |  |  |  |  |  |  |  |  |  |  |  |  |  |  |  |  |  |  |  |  |  |  |  |  |  |  |  |  |  |  |  |  |  |  |  |  |  |  |  |  |  |  |  |  |  |  |  |  |  |  |  |  |  |  |  |  |  |  |  |  |  |  |  |  |  |  |  |  |  |  |  |  |  |  |  |  |  |  |  |  |  |  |  |  |  |  |  |  |  |  |  |  |  |  |  |  |  |  |  |  |  |  |  |  |  |  |  |  |  |  |  |  |  |  |  |  |  |  |  |  |  |  |  |  |  |  |  |  |  |  |  |  |  |  |  |  |  |  |  |  |  |  |  |  |  |  |  |  |  |  |  |  |  |    |
| 47 | Propynyl propionate | C6H8O2  | 0.06±0.01c | 0.64±0.23a | ND         | 0.19±0.06b | 0.13  | ± | 0.26  | ±  | ND    | 1.11±  | ND    | 0.17  | 0.38± | 0.24±  | 0.26  | 0.35±  | 1.69±  | 0.45±  | 0.21  | ND     | 1.1    | ±     | 0.42  |      |  |  |  |  |  |  |  |  |  |  |  |  |  |  |  |  |  |  |  |  |  |  |  |  |  |  |  |  |  |  |  |  |  |  |  |  |  |  |  |  |  |  |  |  |  |  |  |  |  |  |  |  |  |  |  |  |  |  |  |  |  |  |  |  |  |  |  |  |  |  |  |  |  |  |  |  |  |  |  |  |  |  |  |  |  |  |  |  |  |  |  |  |  |  |  |  |  |  |  |  |  |  |  |  |  |  |  |  |  |  |  |  |  |  |  |  |  |  |  |  |  |  |  |  |  |  |  |  |  |  |  |  |  |  |  |  |  |  |  |  |  |  |  |  |  |  |  |  |  |  |  |  |  |  |  |  |  |  |  |  |  |  |  |  |  |  |  |  |  |  |  |  |  |  |  |  |  |  |  |  |  |  |  |  |  |  |  |  |  |  |  |  |  |  |  |  |  |  |  |  |  |  |  |  |  |  |  |  |  |  |  |  |  |  |  |  |  |  |  |  |  |  |  |  |  |  |  |  |  |  |  |  |  |  |  |  |  |  |  |  |  |  |  |  |  |  |  |  |  |  |  |  |  |  |  |  |  |  |  |  |  |  |  |  |  |  |  |  |  |  |  |  |  |  |  |  |  |  |  |  |  |  |  |  |  |  |  |  |  |  |  |  |  |  |  |  |  |  |  |  |  |  |  |  |  |  |  |  |  |  |  |  |  |  |  |  |  |  |  |  |  |  |  |  |  |  |  |  |  |  |  |  |  |  |  |  |  |  |  |  |  |  |  |  |  |  |  |  |  |  |  |  |  |  |  |  |  |  |  |  |  |  |  |  |  |  |  |  |  |  |  |  |  |  |  |  |  |  |  |  |  |  |  |  |  |  |  |  |  |  |  |  |  |  |  |  |  |  |  |  |  |  |  |  |  |  |  |  |  |  |  |  |  |  |  |  |  |  |  |  |  |  |  |  |  |  |  |  |  |  |  |  |  |  |  |  |  |  |  |  |  |  |  |  |  |  |  |  |  |  |  |  |  |  |  |  |  |  |  |  |  |  |  |  |  |  |  |  |  |  |  |  |  |  |  |  |  |  |  |  |  |  |  |  |  |  |  |  |  |  |  |  |  |  |  |  |  |  |  |  |  |  |  |  |  |  |  |  |  |  |  |  |  |  |  |  |  |  |  |  |  |  |  |  |  |  |  |  |  |  |  |  |  |  |  |  |  |  |  |  |  |  |  |  |  |  |  |  |  |  |  |  |  |  |  |  |  |  |  |  |  |  |  |  |  |  |  |  |  |  |  |  |  |  |  |  |  |  |  |  |  |  |  |  |  |  |  |  |  |  |  |  |  |  |  |  |  |  |  |  |  |  |  |  |  |  |  |  |  |  |  |  |  |  |  |  |  |  |  |  |  |  |  |  |  |  |  |  |  |  |  |  |  |  |  |  |  |  |  |  |  |  |  |  |  |  |  |  |  |  |  |  |  |  |  |  |  |  |  |  |  |  |  |  |  |  |  |  |  |  |  |  |  |  |  |  |  |  |  |  |  |  |  |  |  |  |  |  |  |  |  |  |  |  |  |  |  |  |  |  |  |  |  |  |  |  |  |  |  |  |  |  |  |  |  |  |  |  |  |  |  |  |  |  |  |  |  |  |  |  |  |  |  |  |  |  |  |  |  |  |  |  |  |  |  |  |  |  |  |  |  |  |  |  |  |  |  |  |  |  |  |  |  |  |  |  |  |  |  |  |  |  |  |  |  |  |  |  |  |  |  |  |  |  |  |  |  |  |  |  |  |  |  |  |  |  |  |  |  |  |  |  |  |  |  |  |  |  |  |  |  |  |  |  |  |  |  |  |  |  |  |  |  |  |  |  |  |  |  |    |
|    |                     |         |            |            |            |            | 0.02c |   | 0.11b |    |       | 0.38a  |       | ±     | 0.14a | 0.07b  | ±     | 0.23c  | 0.35a  | 0.19b  | ±     |        | 0.54a  | ±     |       |      |  |  |  |  |  |  |  |  |  |  |  |  |  |  |  |  |  |  |  |  |  |  |  |  |  |  |  |  |  |  |  |  |  |  |  |  |  |  |  |  |  |  |  |  |  |  |  |  |  |  |  |  |  |  |  |  |  |  |  |  |  |  |  |  |  |  |  |  |  |  |  |  |  |  |  |  |  |  |  |  |  |  |  |  |  |  |  |  |  |  |  |  |  |  |  |  |  |  |  |  |  |  |  |  |  |  |  |  |  |  |  |  |  |  |  |  |  |  |  |  |  |  |  |  |  |  |  |  |  |  |  |  |  |  |  |  |  |  |  |  |  |  |  |  |  |  |  |  |  |  |  |  |  |  |  |  |  |  |  |  |  |  |  |  |  |  |  |  |  |  |  |  |  |  |  |  |  |  |  |  |  |  |  |  |  |  |  |  |  |  |  |  |  |  |  |  |  |  |  |  |  |  |  |  |  |  |  |  |  |  |  |  |  |  |  |  |  |  |  |  |  |  |  |  |  |  |  |  |  |  |  |  |  |  |  |  |  |  |  |  |  |  |  |  |  |  |  |  |  |  |  |  |  |  |  |  |  |  |  |  |  |  |  |  |  |  |  |  |  |  |  |  |  |  |  |  |  |  |  |  |  |  |  |  |  |  |  |  |  |  |  |  |  |  |  |  |  |  |  |  |  |  |  |  |  |  |  |  |  |  |  |  |  |  |  |  |  |  |  |  |  |  |  |  |  |  |  |  |  |  |  |  |  |  |  |  |  |  |  |  |  |  |  |  |  |  |  |  |  |  |  |  |  |  |  |  |  |  |  |  |  |  |  |  |  |  |  |  |  |  |  |  |  |  |  |  |  |  |  |  |  |  |  |  |  |  |  |  |  |  |  |  |  |  |  |  |  |  |  |  |  |  |  |  |  |  |  |  |  |  |  |  |  |  |  |  |  |  |  |  |  |  |  |  |  |  |  |  |  |  |  |  |  |  |  |  |  |  |  |  |  |  |  |  |  |  |  |  |  |  |  |  |  |  |  |  |  |  |  |  |  |  |  |  |  |  |  |  |  |  |  |  |  |  |  |  |  |  |  |  |  |  |  |  |  |  |  |  |  |  |  |  |  |  |  |  |  |  |  |  |  |  |  |  |  |  |  |  |  |  |  |  |  |  |  |  |  |  |  |  |  |  |  |  |  |  |  |  |  |  |  |  |  |  |  |  |  |  |  |  |  |  |  |  |  |  |  |  |  |  |  |  |  |  |  |  |  |  |  |  |  |  |  |  |  |  |  |  |  |  |  |  |  |  |  |  |  |  |  |  |  |  |  |  |  |  |  |  |  |  |  |  |  |  |  |  |  |  |  |  |  |  |  |  |  |  |  |  |  |  |  |  |  |  |  |  |  |  |  |  |  |  |  |  |  |  |  |  |  |  |  |  |  |  |  |  |  |  |  |  |  |  |  |  |  |  |  |  |  |  |  |  |  |  |  |  |  |  |  |  |  |  |  |  |  |  |  |  |  |  |  |  |  |  |  |  |  |  |  |  |  |  |  |  |  |  |  |  |  |  |  |  |  |  |  |  |  |  |  |  |  |  |  |  |  |  |  |  |  |  |  |  |  |  |  |  |  |  |  |  |  |  |  |  |  |  |  |  |  |  |  |  |  |  |  |  |  |  |  |  |  |  |  |  |  |  |  |  |  |  |  |  |  |  |  |  |  |  |  |  |  |  |  |  |  |  |  |  |  |  |  |  |  |  |  |  |  |  |  |  |  |  |  |  |  |  |  |  |  |  |  |  |  |  |  |  |  |  |  |  |  |  |  |  |  |  |  |  |  |  |  |  |  |  |  |  |  |  |  |  |  |  |  |  |  |  |  |  |  |    |
|    |                     |         |            |            |            |            |       |   |       |    |       |        | 0.05c |       |       | 0.12d  |       |        |        |        | 0.03c |        |        | 0.27b |       |      |  |  |  |  |  |  |  |  |  |  |  |  |  |  |  |  |  |  |  |  |  |  |  |  |  |  |  |  |  |  |  |  |  |  |  |  |  |  |  |  |  |  |  |  |  |  |  |  |  |  |  |  |  |  |  |  |  |  |  |  |  |  |  |  |  |  |  |  |  |  |  |  |  |  |  |  |  |  |  |  |  |  |  |  |  |  |  |  |  |  |  |  |  |  |  |  |  |  |  |  |  |  |  |  |  |  |  |  |  |  |  |  |  |  |  |  |  |  |  |  |  |  |  |  |  |  |  |  |  |  |  |  |  |  |  |  |  |  |  |  |  |  |  |  |  |  |  |  |  |  |  |  |  |  |  |  |  |  |  |  |  |  |  |  |  |  |  |  |  |  |  |  |  |  |  |  |  |  |  |  |  |  |  |  |  |  |  |  |  |  |  |  |  |  |  |  |  |  |  |  |  |  |  |  |  |  |  |  |  |  |  |  |  |  |  |  |  |  |  |  |  |  |  |  |  |  |  |  |  |  |  |  |  |  |  |  |  |  |  |  |  |  |  |  |  |  |  |  |  |  |  |  |  |  |  |  |  |  |  |  |  |  |  |  |  |  |  |  |  |  |  |  |  |  |  |  |  |  |  |  |  |  |  |  |  |  |  |  |  |  |  |  |  |  |  |  |  |  |  |  |  |  |  |  |  |  |  |  |  |  |  |  |  |  |  |  |  |  |  |  |  |  |  |  |  |  |  |  |  |  |  |  |  |  |  |  |  |  |  |  |  |  |  |  |  |  |  |  |  |  |  |  |  |  |  |  |  |  |  |  |  |  |  |  |  |  |  |  |  |  |  |  |  |  |  |  |  |  |  |  |  |  |  |  |  |  |  |  |  |  |  |  |  |  |  |  |  |  |  |  |  |  |  |  |  |  |  |  |  |  |  |  |  |  |  |  |  |  |  |  |  |  |  |  |  |  |  |  |  |  |  |  |  |  |  |  |  |  |  |  |  |  |  |  |  |  |  |  |  |  |  |  |  |  |  |  |  |  |  |  |  |  |  |  |  |  |  |  |  |  |  |  |  |  |  |  |  |  |  |  |  |  |  |  |  |  |  |  |  |  |  |  |  |  |  |  |  |  |  |  |  |  |  |  |  |  |  |  |  |  |  |  |  |  |  |  |  |  |  |  |  |  |  |  |  |  |  |  |  |  |  |  |  |  |  |  |  |  |  |  |  |  |  |  |  |  |  |  |  |  |  |  |  |  |  |  |  |  |  |  |  |  |  |  |  |  |  |  |  |  |  |  |  |  |  |  |  |  |  |  |  |  |  |  |  |  |  |  |  |  |  |  |  |  |  |  |  |  |  |  |  |  |  |  |  |  |  |  |  |  |  |  |  |  |  |  |  |  |  |  |  |  |  |  |  |  |  |  |  |  |  |  |  |  |  |  |  |  |  |  |  |  |  |  |  |  |  |  |  |  |  |  |  |  |  |  |  |  |  |  |  |  |  |  |  |  |  |  |  |  |  |  |  |  |  |  |  |  |  |  |  |  |  |  |  |  |  |  |  |  |  |  |  |  |  |  |  |  |  |  |  |  |  |  |  |  |  |  |  |  |  |  |  |  |  |  |  |  |  |  |  |  |  |  |  |  |  |  |  |  |  |  |  |  |  |  |  |  |  |  |  |  |  |  |  |  |  |  |  |  |  |  |  |  |  |  |  |  |  |  |  |  |  |  |  |  |  |  |  |  |  |  |  |  |  |  |  |  |  |  |  |  |  |  |  |  |  |  |  |  |  |  |  |  |  |  |  |  |  |  |  |  |  |  |  |  |  |  |  |  |  |  |  |  |  |  |  |  |  |  |  |  |  |  |  |  |  |  |  |    |
| 48 | Melonal             | C9H16O  | 0.4±0.13b  | 0.31±0.05b | 0.1±0.03c  | 0.54±0.23a | 0.39  | ± | 0.44  | ±  | 0.35± | 0.85±  | 0.86± | 0.88  | 1.84± | 1.9    | ±     | 1.02   | 1.33±  | 1.99±  | 2.67± | 1.2    | ±      | 1.25± | 2.49± | 3.5± |  |  |  |  |  |  |  |  |  |  |  |  |  |  |  |  |  |  |  |  |  |  |  |  |  |  |  |  |  |  |  |  |  |  |  |  |  |  |  |  |  |  |  |  |  |  |  |  |  |  |  |  |  |  |  |  |  |  |  |  |  |  |  |  |  |  |  |  |  |  |  |  |  |  |  |  |  |  |  |  |  |  |  |  |  |  |  |  |  |  |  |  |  |  |  |  |  |  |  |  |  |  |  |  |  |  |  |  |  |  |  |  |  |  |  |  |  |  |  |  |  |  |  |  |  |  |  |  |  |  |  |  |  |  |  |  |  |  |  |  |  |  |  |  |  |  |  |  |  |  |  |  |  |  |  |  |  |  |  |  |  |  |  |  |  |  |  |  |  |  |  |  |  |  |  |  |  |  |  |  |  |  |  |  |  |  |  |  |  |  |  |  |  |  |  |  |  |  |  |  |  |  |  |  |  |  |  |  |  |  |  |  |  |  |  |  |  |  |  |  |  |  |  |  |  |  |  |  |  |  |  |  |  |  |  |  |  |  |  |  |  |  |  |  |  |  |  |  |  |  |  |  |  |  |  |  |  |  |  |  |  |  |  |  |  |  |  |  |  |  |  |  |  |  |  |  |  |  |  |  |  |  |  |  |  |  |  |  |  |  |  |  |  |  |  |  |  |  |  |  |  |  |  |  |  |  |  |  |  |  |  |  |  |  |  |  |  |  |  |  |  |  |  |  |  |  |  |  |  |  |  |  |  |  |  |  |  |  |  |  |  |  |  |  |  |  |  |  |  |  |  |  |  |  |  |  |  |  |  |  |  |  |  |  |  |  |  |  |  |  |  |  |  |  |  |  |  |  |  |  |  |  |  |  |  |  |  |  |  |  |  |  |  |  |  |  |  |  |  |  |  |  |  |  |  |  |  |  |  |  |  |  |  |  |  |  |  |  |  |  |  |  |  |  |  |  |  |  |  |  |  |  |  |  |  |  |  |  |  |  |  |  |  |  |  |  |  |  |  |  |  |  |  |  |  |  |  |  |  |  |  |  |  |  |  |  |  |  |  |  |  |  |  |  |  |  |  |  |  |  |  |  |  |  |  |  |  |  |  |  |  |  |  |  |  |  |  |  |  |  |  |  |  |  |  |  |  |  |  |  |  |  |  |  |  |  |  |  |  |  |  |  |  |  |  |  |  |  |  |  |  |  |  |  |  |  |  |  |  |  |  |  |  |  |  |  |  |  |  |  |  |  |  |  |  |  |  |  |  |  |  |  |  |  |  |  |  |  |  |  |  |  |  |  |  |  |  |  |  |  |  |  |  |  |  |  |  |  |  |  |  |  |  |  |  |  |  |  |  |  |  |  |  |  |  |  |  |  |  |  |  |  |  |  |  |  |  |  |  |  |  |  |  |  |  |  |  |  |  |  |  |  |  |  |  |  |  |  |  |  |  |  |  |  |  |  |  |  |  |  |  |  |  |  |  |  |  |  |  |  |  |  |  |  |  |  |  |  |  |  |  |  |  |  |  |  |  |  |  |  |  |  |  |  |  |  |  |  |  |  |  |  |  |  |  |  |  |  |  |  |  |  |  |  |  |  |  |  |  |  |  |  |  |  |  |  |  |  |  |  |  |  |  |  |  |  |  |  |  |  |  |  |  |  |  |  |  |  |  |  |  |  |  |  |  |  |  |  |  |  |  |  |  |  |  |  |  |  |  |  |  |  |  |  |  |  |  |  |  |  |  |  |  |  |  |  |  |  |  |  |  |  |  |  |  |  |  |  |  |  |  |  |  |  |  |  |  |  |  |  |  |  |  |  |  |  |  |  |  |  |  |  |  |  |  |  |  |  |  |  |  |  |  |  |  |  |  |  |  |    |
|    |                     |         |            |            |            |            | 0.17c |   | 0.1b  |    | 0.11d | 0.09a  | 0.23b | ±     | 0.42a | 0.51a  | ±     | 0.41c  | 0.81b  | 1.21a  | 0.2c  | 0.41c  | 1.02b  | 1.25a |       |      |  |  |  |  |  |  |  |  |  |  |  |  |  |  |  |  |  |  |  |  |  |  |  |  |  |  |  |  |  |  |  |  |  |  |  |  |  |  |  |  |  |  |  |  |  |  |  |  |  |  |  |  |  |  |  |  |  |  |  |  |  |  |  |  |  |  |  |  |  |  |  |  |  |  |  |  |  |  |  |  |  |  |  |  |  |  |  |  |  |  |  |  |  |  |  |  |  |  |  |  |  |  |  |  |  |  |  |  |  |  |  |  |  |  |  |  |  |  |  |  |  |  |  |  |  |  |  |  |  |  |  |  |  |  |  |  |  |  |  |  |  |  |  |  |  |  |  |  |  |  |  |  |  |  |  |  |  |  |  |  |  |  |  |  |  |  |  |  |  |  |  |  |  |  |  |  |  |  |  |  |  |  |  |  |  |  |  |  |  |  |  |  |  |  |  |  |  |  |  |  |  |  |  |  |  |  |  |  |  |  |  |  |  |  |  |  |  |  |  |  |  |  |  |  |  |  |  |  |  |  |  |  |  |  |  |  |  |  |  |  |  |  |  |  |  |  |  |  |  |  |  |  |  |  |  |  |  |  |  |  |  |  |  |  |  |  |  |  |  |  |  |  |  |  |  |  |  |  |  |  |  |  |  |  |  |  |  |  |  |  |  |  |  |  |  |  |  |  |  |  |  |  |  |  |  |  |  |  |  |  |  |  |  |  |  |  |  |  |  |  |  |  |  |  |  |  |  |  |  |  |  |  |  |  |  |  |  |  |  |  |  |  |  |  |  |  |  |  |  |  |  |  |  |  |  |  |  |  |  |  |  |  |  |  |  |  |  |  |  |  |  |  |  |  |  |  |  |  |  |  |  |  |  |  |  |  |  |  |  |  |  |  |  |  |  |  |  |  |  |  |  |  |  |  |  |  |  |  |  |  |  |  |  |  |  |  |  |  |  |  |  |  |  |  |  |  |  |  |  |  |  |  |  |  |  |  |  |  |  |  |  |  |  |  |  |  |  |  |  |  |  |  |  |  |  |  |  |  |  |  |  |  |  |  |  |  |  |  |  |  |  |  |  |  |  |  |  |  |  |  |  |  |  |  |  |  |  |  |  |  |  |  |  |  |  |  |  |  |  |  |  |  |  |  |  |  |  |  |  |  |  |  |  |  |  |  |  |  |  |  |  |  |  |  |  |  |  |  |  |  |  |  |  |  |  |  |  |  |  |  |  |  |  |  |  |  |  |  |  |  |  |  |  |  |  |  |  |  |  |  |  |  |  |  |  |  |  |  |  |  |  |  |  |  |  |  |  |  |  |  |  |  |  |  |  |  |  |  |  |  |  |  |  |  |  |  |  |  |  |  |  |  |  |  |  |  |  |  |  |  |  |  |  |  |  |  |  |  |  |  |  |  |  |  |  |  |  |  |  |  |  |  |  |  |  |  |  |  |  |  |  |  |  |  |  |  |  |  |  |  |  |  |  |  |  |  |  |  |  |  |  |  |  |  |  |  |  |  |  |  |  |  |  |  |  |  |  |  |  |  |  |  |  |  |  |  |  |  |  |  |  |  |  |  |  |  |  |  |  |  |  |  |  |  |  |  |  |  |  |  |  |  |  |  |  |  |  |  |  |  |  |  |  |  |  |  |  |  |  |  |  |  |  |  |  |  |  |  |  |  |  |  |  |  |  |  |  |  |  |  |  |  |  |  |  |  |  |  |  |  |  |  |  |  |  |  |  |  |  |  |  |  |  |  |  |  |  |  |  |  |  |  |  |  |  |  |  |  |  |  |  |  |  |  |  |  |  |  |  |  |  |  |  |  |  |  |  |  |  |  |  |  |  |  |  |  |  |  |  |  |  |  |  |  |  |  |  |  |  |    |
|    |                     |         |            |            |            |            |       |   |       |    |       |        | 0.14b |       |       | 0.29a  |       |        |        |        |       |        |        |       |       |      |  |  |  |  |  |  |  |  |  |  |  |  |  |  |  |  |  |  |  |  |  |  |  |  |  |  |  |  |  |  |  |  |  |  |  |  |  |  |  |  |  |  |  |  |  |  |  |  |  |  |  |  |  |  |  |  |  |  |  |  |  |  |  |  |  |  |  |  |  |  |  |  |  |  |  |  |  |  |  |  |  |  |  |  |  |  |  |  |  |  |  |  |  |  |  |  |  |  |  |  |  |  |  |  |  |  |  |  |  |  |  |  |  |  |  |  |  |  |  |  |  |  |  |  |  |  |  |  |  |  |  |  |  |  |  |  |  |  |  |  |  |  |  |  |  |  |  |  |  |  |  |  |  |  |  |  |  |  |  |  |  |  |  |  |  |  |  |  |  |  |  |  |  |  |  |  |  |  |  |  |  |  |  |  |  |  |  |  |  |  |  |  |  |  |  |  |  |  |  |  |  |  |  |  |  |  |  |  |  |  |  |  |  |  |  |  |  |  |  |  |  |  |  |  |  |  |  |  |  |  |  |  |  |  |  |  |  |  |  |  |  |  |  |  |  |  |  |  |  |  |  |  |  |  |  |  |  |  |  |  |  |  |  |  |  |  |  |  |  |  |  |  |  |  |  |  |  |  |  |  |  |  |  |  |  |  |  |  |  |  |  |  |  |  |  |  |  |  |  |  |  |  |  |  |  |  |  |  |  |  |  |  |  |  |  |  |  |  |  |  |  |  |  |  |  |  |  |  |  |  |  |  |  |  |  |  |  |  |  |  |  |  |  |  |  |  |  |  |  |  |  |  |  |  |  |  |  |  |  |  |  |  |  |  |  |  |  |  |  |  |  |  |  |  |  |  |  |  |  |  |  |  |  |  |  |  |  |  |  |  |  |  |  |  |  |  |  |  |  |  |  |  |  |  |  |  |  |  |  |  |  |  |  |  |  |  |  |  |  |  |  |  |  |  |  |  |  |  |  |  |  |  |  |  |  |  |  |  |  |  |  |  |  |  |  |  |  |  |  |  |  |  |  |  |  |  |  |  |  |  |  |  |  |  |  |  |  |  |  |  |  |  |  |  |  |  |  |  |  |  |  |  |  |  |  |  |  |  |  |  |  |  |  |  |  |  |  |  |  |  |  |  |  |  |  |  |  |  |  |  |  |  |  |  |  |  |  |  |  |  |  |  |  |  |  |  |  |  |  |  |  |  |  |  |  |  |  |  |  |  |  |  |  |  |  |  |  |  |  |  |  |  |  |  |  |  |  |  |  |  |  |  |  |  |  |  |  |  |  |  |  |  |  |  |  |  |  |  |  |  |  |  |  |  |  |  |  |  |  |  |  |  |  |  |  |  |  |  |  |  |  |  |  |  |  |  |  |  |  |  |  |  |  |  |  |  |  |  |  |  |  |  |  |  |  |  |  |  |  |  |  |  |  |  |  |  |  |  |  |  |  |  |  |  |  |  |  |  |  |  |  |  |  |  |  |  |  |  |  |  |  |  |  |  |  |  |  |  |  |  |  |  |  |  |  |  |  |  |  |  |  |  |  |  |  |  |  |  |  |  |  |  |  |  |  |  |  |  |  |  |  |  |  |  |  |  |  |  |  |  |  |  |  |  |  |  |  |  |  |  |  |  |  |  |  |  |  |  |  |  |  |  |  |  |  |  |  |  |  |  |  |  |  |  |  |  |  |  |  |  |  |  |  |  |  |  |  |  |  |  |  |  |  |  |  |  |  |  |  |  |  |  |  |  |  |  |  |  |  |  |  |  |  |  |  |  |  |  |  |  |  |  |  |  |  |  |  |  |  |  |  |  |  |  |  |  |  |  |  |  |  |  |  |  |  |  |  |  |  |  |  |  |  |  |  |  |  |  |  |    |
| 49 | Hexanal             | C6H12O  | 0.11±0.03d | 0.44±0.12a | 0.25±0.05c | 0.39±0.13b | 0.23  | ± | 37.85 | ±  | 41.04 | 56.68  | 61.18 | 88.89 | 61.99 | 118.87 | 65.89 | 128.48 | 130.71 | 123.39 | 86.53 | 361.69 | 152.72 | 137.8 |       |      |  |  |  |  |  |  |  |  |  |  |  |  |  |  |  |  |  |  |  |  |  |  |  |  |  |  |  |  |  |  |  |  |  |  |  |  |  |  |  |  |  |  |  |  |  |  |  |  |  |  |  |  |  |  |  |  |  |  |  |  |  |  |  |  |  |  |  |  |  |  |  |  |  |  |  |  |  |  |  |  |  |  |  |  |  |  |  |  |  |  |  |  |  |  |  |  |  |  |  |  |  |  |  |  |  |  |  |  |  |  |  |  |  |  |  |  |  |  |  |  |  |  |  |  |  |  |  |  |  |  |  |  |  |  |  |  |  |  |  |  |  |  |  |  |  |  |  |  |  |  |  |  |  |  |  |  |  |  |  |  |  |  |  |  |  |  |  |  |  |  |  |  |  |  |  |  |  |  |  |  |  |  |  |  |  |  |  |  |  |  |  |  |  |  |  |  |  |  |  |  |  |  |  |  |  |  |  |  |  |  |  |  |  |  |  |  |  |  |  |  |  |  |  |  |  |  |  |  |  |  |  |  |  |  |  |  |  |  |  |  |  |  |  |  |  |  |  |  |  |  |  |  |  |  |  |  |  |  |  |  |  |  |  |  |  |  |  |  |  |  |  |  |  |  |  |  |  |  |  |  |  |  |  |  |  |  |  |  |  |  |  |  |  |  |  |  |  |  |  |  |  |  |  |  |  |  |  |  |  |  |  |  |  |  |  |  |  |  |  |  |  |  |  |  |  |  |  |  |  |  |  |  |  |  |  |  |  |  |  |  |  |  |  |  |  |  |  |  |  |  |  |  |  |  |  |  |  |  |  |  |  |  |  |  |  |  |  |  |  |  |  |  |  |  |  |  |  |  |  |  |  |  |  |  |  |  |  |  |  |  |  |  |  |  |  |  |  |  |  |  |  |  |  |  |  |  |  |  |  |  |  |  |  |  |  |  |  |  |  |  |  |  |  |  |  |  |  |  |  |  |  |  |  |  |  |  |  |  |  |  |  |  |  |  |  |  |  |  |  |  |  |  |  |  |  |  |  |  |  |  |  |  |  |  |  |  |  |  |  |  |  |  |  |  |  |  |  |  |  |  |  |  |  |  |  |  |  |  |  |  |  |  |  |  |  |  |  |  |  |  |  |  |  |  |  |  |  |  |  |  |  |  |  |  |  |  |  |  |  |  |  |  |  |  |  |  |  |  |  |  |  |  |  |  |  |  |  |  |  |  |  |  |  |  |  |  |  |  |  |  |  |  |  |  |  |  |  |  |  |  |  |  |  |  |  |  |  |  |  |  |  |  |  |  |  |  |  |  |  |  |  |  |  |  |  |  |  |  |  |  |  |  |  |  |  |  |  |  |  |  |  |  |  |  |  |  |  |  |  |  |  |  |  |  |  |  |  |  |  |  |  |  |  |  |  |  |  |  |  |  |  |  |  |  |  |  |  |  |  |  |  |  |  |  |  |  |  |  |  |  |  |  |  |  |  |  |  |  |  |  |  |  |  |  |  |  |  |  |  |  |  |  |  |  |  |  |  |  |  |  |  |  |  |  |  |  |  |  |  |  |  |  |  |  |  |  |  |  |  |  |  |  |  |  |  |  |  |  |  |  |  |  |  |  |  |  |  |  |  |  |  |  |  |  |  |  |  |  |  |  |  |  |  |  |  |  |  |  |  |  |  |  |  |  |  |  |  |  |  |  |  |  |  |  |  |  |  |  |  |  |  |  |  |  |  |  |  |  |  |  |  |  |  |  |  |  |  |  |  |  |  |  |  |  |  |  |  |  |  |  |  |  |  |  |  |  |  |  |  |  |  |  |  |  |  |  |  |  |  |  |  |  |  |  |  |  |  |  |  |  |  |  |  |  |  |  |  |  |  |    |
|    |                     |         |            |            |            |            | 0.02d |   | 4.02c |    | ±     | ±      | ±     | ±     | ±     | ±      | ±     | ±      | ±      | ±      | ±     | ±      | ±      | ±     | ±     |      |  |  |  |  |  |  |  |  |  |  |  |  |  |  |  |  |  |  |  |  |  |  |  |  |  |  |  |  |  |  |  |  |  |  |  |  |  |  |  |  |  |  |  |  |  |  |  |  |  |  |  |  |  |  |  |  |  |  |  |  |  |  |  |  |  |  |  |  |  |  |  |  |  |  |  |  |  |  |  |  |  |  |  |  |  |  |  |  |  |  |  |  |  |  |  |  |  |  |  |  |  |  |  |  |  |  |  |  |  |  |  |  |  |  |  |  |  |  |  |  |  |  |  |  |  |  |  |  |  |  |  |  |  |  |  |  |  |  |  |  |  |  |  |  |  |  |  |  |  |  |  |  |  |  |  |  |  |  |  |  |  |  |  |  |  |  |  |  |  |  |  |  |  |  |  |  |  |  |  |  |  |  |  |  |  |  |  |  |  |  |  |  |  |  |  |  |  |  |  |  |  |  |  |  |  |  |  |  |  |  |  |  |  |  |  |  |  |  |  |  |  |  |  |  |  |  |  |  |  |  |  |  |  |  |  |  |  |  |  |  |  |  |  |  |  |  |  |  |  |  |  |  |  |  |  |  |  |  |  |  |  |  |  |  |  |  |  |  |  |  |  |  |  |  |  |  |  |  |  |  |  |  |  |  |  |  |  |  |  |  |  |  |  |  |  |  |  |  |  |  |  |  |  |  |  |  |  |  |  |  |  |  |  |  |  |  |  |  |  |  |  |  |  |  |  |  |  |  |  |  |  |  |  |  |  |  |  |  |  |  |  |  |  |  |  |  |  |  |  |  |  |  |  |  |  |  |  |  |  |  |  |  |  |  |  |  |  |  |  |  |  |  |  |  |  |  |  |  |  |  |  |  |  |  |  |  |  |  |  |  |  |  |  |  |  |  |  |  |  |  |  |  |  |  |  |  |  |  |  |  |  |  |  |  |  |  |  |  |  |  |  |  |  |  |  |  |  |  |  |  |  |  |  |  |  |  |  |  |  |  |  |  |  |  |  |  |  |  |  |  |  |  |  |  |  |  |  |  |  |  |  |  |  |  |  |  |  |  |  |  |  |  |  |  |  |  |  |  |  |  |  |  |  |  |  |  |  |  |  |  |  |  |  |  |  |  |  |  |  |  |  |  |  |  |  |  |  |  |  |  |  |  |  |  |  |  |  |  |  |  |  |  |  |  |  |  |  |  |  |  |  |  |  |  |  |  |  |  |  |  |  |  |  |  |  |  |  |  |  |  |  |  |  |  |  |  |  |  |  |  |  |  |  |  |  |  |  |  |  |  |  |  |  |  |  |  |  |  |  |  |  |  |  |  |  |  |  |  |  |  |  |  |  |  |  |  |  |  |  |  |  |  |  |  |  |  |  |  |  |  |  |  |  |  |  |  |  |  |  |  |  |  |  |  |  |  |  |  |  |  |  |  |  |  |  |  |  |  |  |  |  |  |  |  |  |  |  |  |  |  |  |  |  |  |  |  |  |  |  |  |  |  |  |  |  |  |  |  |  |  |  |  |  |  |  |  |  |  |  |  |  |  |  |  |  |  |  |  |  |  |  |  |  |  |  |  |  |  |  |  |  |  |  |  |  |  |  |  |  |  |  |  |  |  |  |  |  |  |  |  |  |  |  |  |  |  |  |  |  |  |  |  |  |  |  |  |  |  |  |  |  |  |  |  |  |  |  |  |  |  |  |  |  |  |  |  |  |  |  |  |  |  |  |  |  |  |  |  |  |  |  |  |  |  |  |  |  |  |  |  |  |  |  |  |  |  |  |  |  |  |  |  |  |  |  |  |  |  |  |  |  |  |  |  |  |  |  |  |  |  |  |  |  |  |  |  |  |  |  |  |  |  |  |  |  |  |  |  |  |    |
|    |                     |         |            |            |            |            |       |   |       |    | 3.98b | 10.37a | 6.67a | 14.83 | 9.28c | 21.17a | 17.24 | 30.04b | 17.16a | 13.28c | 7.38d | 40.59a | 32.19b | 18.82 |       |      |  |  |  |  |  |  |  |  |  |  |  |  |  |  |  |  |  |  |  |  |  |  |  |  |  |  |  |  |  |  |  |  |  |  |  |  |  |  |  |  |  |  |  |  |  |  |  |  |  |  |  |  |  |  |  |  |  |  |  |  |  |  |  |  |  |  |  |  |  |  |  |  |  |  |  |  |  |  |  |  |  |  |  |  |  |  |  |  |  |  |  |  |  |  |  |  |  |  |  |  |  |  |  |  |  |  |  |  |  |  |  |  |  |  |  |  |  |  |  |  |  |  |  |  |  |  |  |  |  |  |  |  |  |  |  |  |  |  |  |  |  |  |  |  |  |  |  |  |  |  |  |  |  |  |  |  |  |  |  |  |  |  |  |  |  |  |  |  |  |  |  |  |  |  |  |  |  |  |  |  |  |  |  |  |  |  |  |  |  |  |  |  |  |  |  |  |  |  |  |  |  |  |  |  |  |  |  |  |  |  |  |  |  |  |  |  |  |  |  |  |  |  |  |  |  |  |  |  |  |  |  |  |  |  |  |  |  |  |  |  |  |  |  |  |  |  |  |  |  |  |  |  |  |  |  |  |  |  |  |  |  |  |  |  |  |  |  |  |  |  |  |  |  |  |  |  |  |  |  |  |  |  |  |  |  |  |  |  |  |  |  |  |  |  |  |  |  |  |  |  |  |  |  |  |  |  |  |  |  |  |  |  |  |  |  |  |  |  |  |  |  |  |  |  |  |  |  |  |  |  |  |  |  |  |  |  |  |  |  |  |  |  |  |  |  |  |  |  |  |  |  |  |  |  |  |  |  |  |  |  |  |  |  |  |  |  |  |  |  |  |  |  |  |  |  |  |  |  |  |  |  |  |  |  |  |  |  |  |  |  |  |  |  |  |  |  |  |  |  |  |  |  |  |  |  |  |  |  |  |  |  |  |  |  |  |  |  |  |  |  |  |  |  |  |  |  |  |  |  |  |  |  |  |  |  |  |  |  |  |  |  |  |  |  |  |  |  |  |  |  |  |  |  |  |  |  |  |  |  |  |  |  |  |  |  |  |  |  |  |  |  |  |  |  |  |  |  |  |  |  |  |  |  |  |  |  |  |  |  |  |  |  |  |  |  |  |  |  |  |  |  |  |  |  |  |  |  |  |  |  |  |  |  |  |  |  |  |  |  |  |  |  |  |  |  |  |  |  |  |  |  |  |  |  |  |  |  |  |  |  |  |  |  |  |  |  |  |  |  |  |  |  |  |  |  |  |  |  |  |  |  |  |  |  |  |  |  |  |  |  |  |  |  |  |  |  |  |  |  |  |  |  |  |  |  |  |  |  |  |  |  |  |  |  |  |  |  |  |  |  |  |  |  |  |  |  |  |  |  |  |  |  |  |  |  |  |  |  |  |  |  |  |  |  |  |  |  |  |  |  |  |  |  |  |  |  |  |  |  |  |  |  |  |  |  |  |  |  |  |  |  |  |  |  |  |  |  |  |  |  |  |  |  |  |  |  |  |  |  |  |  |  |  |  |  |  |  |  |  |  |  |  |  |  |  |  |  |  |  |  |  |  |  |  |  |  |  |  |  |  |  |  |  |  |  |  |  |  |  |  |  |  |  |  |  |  |  |  |  |  |  |  |  |  |  |  |  |  |  |  |  |  |  |  |  |  |  |  |  |  |  |  |  |  |  |  |  |  |  |  |  |  |  |  |  |  |  |  |  |  |  |  |  |  |  |  |  |  |  |  |  |  |  |  |  |  |  |  |  |  |  |  |  |  |  |  |  |  |  |  |  |  |  |  |  |  |  |  |  |  |  |  |  |  |  |  |  |  |  |  |  |  |  |  |  |  |  |  |  |  |  |  |  |  |  |  |  |  |  |    |
|    |                     |         |            |            |            |            |       |   |       |    |       |        |       |       |       |        |       |        |        |        |       |        |        |       |       |      |  |  |  |  |  |  |  |  |  |  |  |  |  |  |  |  |  |  |  |  |  |  |  |  |  |  |  |  |  |  |  |  |  |  |  |  |  |  |  |  |  |  |  |  |  |  |  |  |  |  |  |  |  |  |  |  |  |  |  |  |  |  |  |  |  |  |  |  |  |  |  |  |  |  |  |  |  |  |  |  |  |  |  |  |  |  |  |  |  |  |  |  |  |  |  |  |  |  |  |  |  |  |  |  |  |  |  |  |  |  |  |  |  |  |  |  |  |  |  |  |  |  |  |  |  |  |  |  |  |  |  |  |  |  |  |  |  |  |  |  |  |  |  |  |  |  |  |  |  |  |  |  |  |  |  |  |  |  |  |  |  |  |  |  |  |  |  |  |  |  |  |  |  |  |  |  |  |  |  |  |  |  |  |  |  |  |  |  |  |  |  |  |  |  |  |  |  |  |  |  |  |  |  |  |  |  |  |  |  |  |  |  |  |  |  |  |  |  |  |  |  |  |  |  |  |  |  |  |  |  |  |  |  |  |  |  |  |  |  |  |  |  |  |  |  |  |  |  |  |  |  |  |  |  |  |  |  |  |  |  |  |  |  |  |  |  |  |  |  |  |  |  |  |  |  |  |  |  |  |  |  |  |  |  |  |  |  |  |  |  |  |  |  |  |  |  |  |  |  |  |  |  |  |  |  |  |  |  |  |  |  |  |  |  |  |  |  |  |  |  |  |  |  |  |  |  |  |  |  |  |  |  |  |  |  |  |  |  |  |  |  |  |  |  |  |  |  |  |  |  |  |  |  |  |  |  |  |  |  |  |  |  |  |  |  |  |  |  |  |  |  |  |  |  |  |  |  |  |  |  |  |  |  |  |  |  |  |  |  |  |  |  |  |  |  |  |  |  |  |  |  |  |  |  |  |  |  |  |  |  |  |  |  |  |  |  |  |  |  |  |  |  |  |  |  |  |  |  |  |  |  |  |  |  |  |  |  |  |  |  |  |  |  |  |  |  |  |  |  |  |  |  |  |  |  |  |  |  |  |  |  |  |  |  |  |  |  |  |  |  |  |  |  |  |  |  |  |  |  |  |  |  |  |  |  |  |  |  |  |  |  |  |  |  |  |  |  |  |  |  |  |  |  |  |  |  |  |  |  |  |  |  |  |  |  |  |  |  |  |  |  |  |  |  |  |  |  |  |  |  |  |  |  |  |  |  |  |  |  |  |  |  |  |  |  |  |  |  |  |  |  |  |  |  |  |  |  |  |  |  |  |  |  |  |  |  |  |  |  |  |  |  |  |  |  |  |  |  |  |  |  |  |  |  |  |  |  |  |  |  |  |  |  |  |  |  |  |  |  |  |  |  |  |  |  |  |  |  |  |  |  |  |  |  |  |  |  |  |  |  |  |  |  |  |  |  |  |  |  |  |  |  |  |  |  |  |  |  |  |  |  |  |  |  |  |  |  |  |  |  |  |  |  |  |  |  |  |  |  |  |  |  |  |  |  |  |  |  |  |  |  |  |  |  |  |  |  |  |  |  |  |  |  |  |  |  |  |  |  |  |  |  |  |  |  |  |  |  |  |  |  |  |  |  |  |  |  |  |  |  |  |  |  |  |  |  |  |  |  |  |  |  |  |  |  |  |  |  |  |  |  |  |  |  |  |  |  |  |  |  |  |  |  |  |  |  |  |  |  |  |  |  |  |  |  |  |  |  |  |  |  |  |  |  |  |  |  |  |  |  |  |  |  |  |  |  |  |  |  |  |  |  |  |  |  |  |  |  |  |  |  |  |  |  |  |  |  |  |  |  |  |  |  |  |  |  |  |  |  |  |  |  |  |  |  |  |  |  |  |  |  |  |  |  |  |  |  |  |  | </ |

| Esters               |                                       |          |                |             |              |                |                |                 |               |               |               |               |                |                |               |               |               |               |               |                |                |               |  |
|----------------------|---------------------------------------|----------|----------------|-------------|--------------|----------------|----------------|-----------------|---------------|---------------|---------------|---------------|----------------|----------------|---------------|---------------|---------------|---------------|---------------|----------------|----------------|---------------|--|
| No.                  | Name                                  | Formula  | Peak 1         |             |              |                | Peak 2         |                 |               |               | Peak 3        |               |                |                | Peak 4        |               |               |               | Peak 5        |                |                |               |  |
|                      |                                       |          | Area           | Height      | Retention    | Area           | Height         | Retention       | Area          | Height        | Retention     | Area          | Height         | Retention      | Area          | Height        | Retention     | Area          | Height        | Retention      | Area           | Height        |  |
| 52                   | 2H-Pyran-2-methanol                   | C6H12O2  | 39.53±5.39a    | 31.57±2.99b | 24.19±7.52d  | 30.54 ± 4.47c  | ND             | ND              | ND            | ND            | ND            | ND            | ND             | ND             | ND            | ND            | ND            | ND            | ND            | ND             | ND             | ND            |  |
| 53                   | D, L-Erythro-1-phenyl-1,2-propanediol | C9H12O2  | ND             | ND          | ND           | ND             | ND             | ND              | ND            | 6.19± 2.73a   | ND            | ND            | 4.52± 1.71a    | 4.83± 0.95a    | ND            | 4.78± 2.21a   | 3.91± 1.73b   | 2.5 ± 0.59c   | 4.15 ± 4.18a  | 7.3 ± 1.09c    | 3.78± 2.77a    | ND            |  |
| Total esters         |                                       |          |                |             |              |                |                |                 |               |               |               |               |                |                |               |               |               |               |               |                |                |               |  |
| 54                   | Propiolic acid ethyl ester            | C5H6O2   | 0.14±0.06b     | 0.14±0.04b  | ND           | 0.37±0.11a     | ND             | ND              | 0.4 ± 0.17a   | 1.03± 0.31b   | 0.33± 0.07c   | 0.35 ± 0.21b  | ND             | 1.39± 0.72a    | 0.37 ± 0.11c  | 0.31± 0.08c   | 2.05± 1.12b   | 3 ± 0.87a     | 0.32 ± 0.47c  | 1.31± 1.43     | 15.43 ± 2.77b  | 19.89 ± 4.23a |  |
| 55                   | Phenylethyl phenylacetate             | C16H16O2 | 0.83±0.23a     | ND          | ND           | 1.86±0.56b     | 4.12 ± 1.71c   | ND              | 17.08 ± 4.97a | 5.32± 1.31b   | 0.5 ± 0.2c    | 0.25 ± 0.13d  | 0.79± 0.31b    | 1.7 ± 0.23a    | 0.21 ± 0.12c  | 0.25± 0.21a   | 0.78± 0.13b   | 0.29± 0.13b   | 0.34 ± 0.45c  | 1.47± 1.13b    | 2.09± 1.13b    | 2.98 ± 1.51a  |  |
| 56                   | Ethyl lactate                         | C5H10O3  | 0.84±0.12a     | 0.8±0.41a   | 0.78±0.26a   | 0.66±0.17b     | 0.36 ± 0.09a   | 0.15 ± 0.03c    | 0.23± 0.11b   | ND            | ND            | 0.44 ± 0.17a  | ND             | 5.34± 1.73b    | 0.7 ± 0.26a   | ND            | ND            | 0.18± 0.04b   | ND            | 0.51± 0.19a    | ND             | 0.22 ± 0.07b  |  |
| 57                   | 2-Methyl butynoate                    | C5H6O2   | ND             | 1.53±0.23a  | 1.33±0.48b   | 1.02±0.32c     | 1.54 ± 0.41b   | 0.26 ± 0.13d    | 0.36± 0.14c   | 2.28± 1.04a   | 0.6 ± 0.15b   | 2.25 ± 1.82a  | 0.69± 0.19b    | 0.33± 0.1c     | 0.2 ± 0.1c    | 0.23± 0.11c   | 0.42± 0.27b   | 0.77± 0.33a   | 0.58 ± 0.04a  | 0.16± 0.04a    | ND ± 0.23a     | 0.64 ± 0.23a  |  |
| 58                   | Methyl salicylate                     | C8H8O3   | 12.53±4.27a    | 12.14±3.93c | 9.87±1.82d   | 12.23 ± 3.19b  | 13.98 ± 4.21d  | 15.54 ± 2.09c   | 15.87 ± 3.85b | 16.61 ± 4.27a | 12.32 ± 4.04d | 16.48 ± 3.73a | 14.41 ± 4.89b  | 14.09 ± 3.71c  | 14.67 ± 5.43a | 12.27 ± 3.77c | 13.37 ± 2.15b | 10.43 ± 1.99d | 13.29 ± 5.65a | 11.71 ± 3.08c  | 11.85 ± 4.92b  | 11.52 ± 1.96d |  |
| Total norisoprenoids |                                       |          |                |             |              |                |                |                 |               |               |               |               |                |                |               |               |               |               |               |                |                |               |  |
| 59                   | β-Damascenone                         | C13H18O  | 85.12 ± 20.12a | ND          | 65.11±17.43b | 62.34 ± 12.88c | 82.36 ± 24.25a | 106.76 ± 37.81b | 86.69 ± 3.85b | 107.9 ± 4.27a | 84.07 ± 4.04d | 107.6 ± 3.73a | 122.43 ± 4.89b | 129.11 ± 3.71c | 106.1 ± 5.43a | 76.18 ± 3.77c | 90.09 ± 2.15b | 91.46 ± 1.99d | 85.31 ± 5.65a | 122.07 ± 3.08c | 130.34 ± 4.92b | 103.9 ± 1.96d |  |

| Total terpenoids       |                                     |         |              |              |    |                |    |              |    |    |                |    |              |               |               |              |               |               |                |                |                |              |              |
|------------------------|-------------------------------------|---------|--------------|--------------|----|----------------|----|--------------|----|----|----------------|----|--------------|---------------|---------------|--------------|---------------|---------------|----------------|----------------|----------------|--------------|--------------|
| 60                     | β-Ionone                            | C13H20O | ND           | ND           | ND | ND             | ND | ND           | ND | ND | ND             | ND | ND           | ND            | 5.12 ± 2.17a  | ND           | 2.22 ± 0.54c  | 4.39 ± 1.38b  | 5.22 ± 1.52b   | 3.33 ± 0.78c   | 5.37 ± 2.4a    | ND           |              |
| 61                     | Linalool                            | C10H18O | ND           | ND           | ND | ND             | ND | ND           | ND | ND | ND             | ND | ND           | ND            | ND            | 1.82 ± 0.39a | 1.89 ± 0.47a  | ND            | ND             | 1.48 ± 0.36b   | 2.84 ± 0.78a   | ND           |              |
| 62                     | α-Terpineol                         | C10H18O | 3.4 ± 1.23a  | ND           | ND | ND             | ND | ND           | ND | ND | 3.57 ± 0.69a   | ND | 2.56 ± 1.54c | 4.14 ± 1.31a  | ND            | ND           | 2.88 ± 1.3a   | ND            | 8.9 ± 3.32a    | 5.74 ± 1.51b   | 5.25 ± 1.42c   | 5.21 ± 0.79c |              |
| 63                     | β-Citronellol                       | C10H20O | ND           | ND           | ND | ND             | ND | ND           | ND | ND | 0.3 ± 0.1b     | ND | 0.73 ± 0.22a | 0.68 ± 0.13a  | 0.34 ± 0.14c  | 0.94 ± 0.36a | 0.93 ± 0.21a  | 0.89 ± 0.52b  | 0.84 ± 0.32c   | 0.99 ± 0.3b    | 1.28 ± 0.71a   | 1.2 ± 0.11a  |              |
| 64                     | Geraniol                            | C10H18O | ND           | ND           | ND | ND             | ND | ND           | ND | ND | ND             | ND | ND           | 0.019 ± 0.01a | ND            | 0.29 ± 0.2a  | 0.19 ± 0.1b   | ND            | 0.018 ± 0.018  | 0.28 ± 0.12a   | 0.29 ± 0.13a   | ND           |              |
| 65                     | Myrcene                             | C10H16  | ND           | ND           | ND | 0.019 ± 0.012a | ±  | ND           | ND | ND | 0.019 ± 0.013a | ND | ND           | ND            | ND            | ND           | 0.029 ± 0.02a | 0.039 ± 0.03b | 0.029 ± 0.021c | 0.038 ± 0.025c | 0.088 ± 0.043b | 0.19 ± 0.06a |              |
| Total volatile phenols |                                     |         |              |              |    |                |    |              |    |    |                |    |              |               |               |              |               |               |                |                |                |              |              |
| 66                     | Phenol, 3,5-bis(1,1-dimethylethyl)- | C14H22O | 7.47 ± 3.21a | 6.19 ± 2.87b | ND | ND             | ND | 8.14 ± 3.79a | ±  | ND | ND             | ND | 9.43 ± 4.27a | ND            | 10.31 ± 3.92b | 9.69 ± 2.84a | ND            | ND            | 8.76 ± 4.93b   | ND             | ND             | ND           | 8.48 ± 4.22a |

|        |                                  |             |              |              |              |              |              |              |    |              |              |               |               |              |               |               |               |               |              |               |               |              |              |
|--------|----------------------------------|-------------|--------------|--------------|--------------|--------------|--------------|--------------|----|--------------|--------------|---------------|---------------|--------------|---------------|---------------|---------------|---------------|--------------|---------------|---------------|--------------|--------------|
| 67     | 2,4-Di-tert-butylphenol          | C14H22O     | ND           | ND           | ND           | 6.25 ± 1.42a | ND           | ND           | ND | 2.92 ± 0.79a | 7.14 ± 5.48a | ND            | 10.52 ± 3.11b | ND           | ND            | ND            | 11.5 ± 6.29a  | ND            | ND           | ND            | 6.73 ± 0.8a   | ND           |              |
| Others |                                  |             |              |              |              |              |              |              |    |              |              |               |               |              |               |               |               |               |              |               |               |              |              |
| 68     | 2-Ethylfuran                     | C6H8O       | ND           | 0.48 ± 0.21a | ND           | ND           | ND           | 0.4 ± 0.11a  | ±  | ND           | ND           | ND            | ND            | ND           | 1.35 ± 0.54a  | ND            | ND            | ND            | 0.43 ± 0.32a | ND            | ND            | ND           | ND           |
| 69     | Cyclohexasiloxane, dodecamethyl- | C12H36O6Si6 | 4.72 ± 1.67b | 3.56 ± 1.24c | 4.98 ± 3.51a | 3.03 ± 1.02d | ND           | 3.01 ± 1.28c | ±  | 5.68 ± 2.74b | 6.2 ± 3.27a  | 12.56 ± 4.38b | 11.61 ± 3.29c | 7.37 ± 3.81a | 19.21 ± 4.29c | 10.69 ± 6.33b | 12.03 ± 2.95a | 16.11 ± 4.74d | 6.03 ± 6.35b | 13.08 ± 4.74d | 15.22 ± 6.35b | 10.3 ± 2.14c | 17.7 ± 6.46a |
| 70     | 2-Propylfuran                    | C7H10O      | 1.05 ± 0.44d | 3.02 ± 2.87c | 3.69 ± 1.58a | 3.31 ± 1.21b | 3.02 ± 2.91a | ±            | ND | 2.48 ± 1.32b | ND           | ND            | ND            | 3.27 ± 1.24a | 2.85 ± 1.39b  | 1.94 ± 0.54a  | ND            | ND            | ND           | ND            | ND            | ND           | ND           |

<sup>1</sup>Tukey’s HSD test, different letters indicate significant differences at P < 0.05.

<sup>2</sup> ND: not detected.
